# Supplementary material for: Potential impacts of marine fuel regulations on Arctic clouds and radiative feedbacks
Source: Copernicus journal article supplement (doi:10.5194/egusphere-2024-1891), 2024-06-27
Supplement: Supplementary file [file egusphere-2024-1891-AC1-supplement.pdf]

# Response to Reviewer Comments on *Potential impacts of marine fuel regulations on Arctic clouds and radiative feedbacks* by Santos et al. (2024)

September 10, 2024

We thank both reviewers for their comments which have helped improve and clarify our manuscript. We have addressed the questions and comments made by the reviewers and submit a revised manuscript. Within this document reviewer comments are presented as *italicized* text, with our direct responses written in **bold** and associated changes to the manuscript highlighted in [blue](#).

## Review 1

*Reviewer comments dos Santos et al. 2024*

*The authors explore potential impacts of shipping activity on the properties and radiative effects of Arctic clouds. They use Large Eddy Simulations to investigate the effects of different fuel types and of emission management by scrubbing, as well as the effect of varying cloud conditions. This study is well set up and described, and I recommend it for publication after some minor comments are addressed.*

*General comments:*

*1. Non-cloud effects: Some broader overview (in the introduction) on the other potential impacts of arctic shipping on radiative forcing would be helpful. An order-of-magnitude estimate for the effect of, e.g., soot-on-snow albedo reduction, as well as direct radiative effects of aerosol in the arctic, or other effects, would be particularly valuable to situate the study in context and increase its value for non-cloud-scientists.*

**We have added a paragraph in the introduction which addresses the reviewer's comment:**

Ship exhaust emissions also have the potential to exert radiative forcing via direct interactions between emitted particles and solar radiation, or via reduction of the surface albedo due to deposition of light-absorbing black carbon (BC) particles onto snow. A modelling study by Dalsøren et al. (2013) examined a number of direct and indirect processes related to shipping emissions and radiative processes. The study found significant seasonal variability for all processes and that direct sulfate aerosol interactions exert the largest radiative forcing (positive) out of all processes, i.e., a larger forcing than aerosol-cloud interactions. Given IMO's marine fuel policies, the impact of ship-related sulfate contributions may be subject to large uncertainties. In contrast, Gilgen et al. (2018) and Stephenson et al. (2018) found that radiative forcing induced by aerosol-cloud interactions outweighs forcing exerted by direct aerosol-radiation interaction and BC deposition onto snow. Similarly, Browse et al. (2013) and Li et al. (2021) report only minor contributions of BC deposition from shipping activity which would yield insignificant changes in radiative forcing and not contribute to accelerated sea ice loss. While these findings apply for the Arctic in general, surface albedo adjustments due to BC deposition may have stronger local constrained impacts, for example, in the sub-Arctic region (Browse et al., 2013).

*2. Semi-direct aerosol effect: Connected to the above point, in your simulations, radiation is not coupled to aerosol (l. 176). Can semi-direct effects of aerosol on clouds be excluded? What is the reason for not including this in the modelling?*

**Semi-direct aerosol effects cannot be excluded, and are very complex to simulate. The model version used in this study does not have aerosol-radiation interactions implemented. An implementation of respective processes is currently in development.**

*3. Ice phase effects: You mention in the introduction, l.95, that Christensen'14 and Possner'17 observe shifts to the ice phase from ship aerosols. In the methods, ll.168-171, you describe the choice of constant, diagnostic ice crystal number concentrations,*

*motivated by the findings of ship aerosol as ineffective INPs. Is this not contradictory? In this setup, could it be misleading to write in the abstract (l. 15): “Simulated enhancements [...] predominantly affected the liquid phase properties of the cloud...” without referencing the diagnostic Ni used (same in l. 372)?*

MIMICA includes a large number of options for the implementation of aerosol particles and microphysical processes. The decision to utilize diagnostic ice crystal number concentrations was both motivated by our findings regarding the ineffectiveness of ship exhaust particle to act as INP (as correctly pointed out by the reviewer) and due to it being a well established method already used with MIMICA and the ASCOS case (e.g., Stevens et al. (2018); Bulatovic et al. (2021); Frostenberg et al. (2023)). Regarding Christensen et al. (2014) it is important to highlight that the authors observed signals of increased ice fractions in ship-exhaust polluted clouds for only one of the two employed methods. Furthermore, the authors point out that a simultaneous increase in cloud droplet numbers may have increased the noise in the retrievals potentially increasing uncertainties (Christensen et al., 2014). In both cases meteorological (e.g., inversion layer height, and temperature and humidity profiles) and macrophysical cloud properties (e.g., cloud thickness and hydrometeor background concentrations) varied substantially compared to the ASCOS case (Christensen et al., 2014; Possner et al., 2017). Possner et al. (2017), for example, utilized INP background concentrations of  $2 - 5 \text{ L}^{-1}$  and varied additional shipping-related INP between 0 and  $5 \text{ L}^{-1}$  (for comparison, our study, as well as the aforementioned MIMICA-related studies, utilized ice crystal number concentrations of  $0.2 \text{ L}^{-1}$ ). All these differences in observational data and implementation of numerical methods add to uncertainty of the outcome and should be considered. L. 15 in the abstract has been rephrased to:

Simulations with diagnostic ice crystal number concentrations revealed that enhancements of ship exhaust particles predominantly affected the liquid-phase properties of the cloud [...].

*Specific comments:*

1. L.240: *Do you have a hypothesis for the mechanism for higher LWP with prescribed aerosol?*

This is due to the absence of aerosol removal upon activation into droplets when aerosol are fully prescribed as in this study. In Stevens et al. (2018), the authors report that precipitation formation and thus, removal of aerosol to the surface, are depressed with increasing initial aerosol concentrations. This drizzle suppression allows for a build up of liquid cloud water.

2. L.322: *“Similar relationships [...] were also noted by Christiansen et al. (2020).”*

Corrected. The sentence now reads:

Similar relationships between increased LWP and a reduced LW radiative cooling were also noted by Christiansen et al. (2020).

3. L.327: “Which is expected given the relatively large LWP” Is this because the albedo-LWP relationship saturates?

**We have expanded our discussion regarding changes in SW surface fluxes. The corresponding paragraph in Section 3.3 now reads:**

The net SW radiation is positive in all simulations, meaning the net flux is downwelling. In all simulations, the net SW fluxes initially increase until 6 h into the respective simulations where a maximum of around  $14 \text{ W m}^{-2}$  is reached. By the end of the simulations, net SW decreases to  $\approx 5 \text{ W m}^{-2}$ . The temporal trends in LW and SW radiation both coincide with the solar angle. The results indicate that WS cases tend to slightly decrease the net SW (Table 2 and Figure C1), yet, none of the ship sensitivity tests are found to significantly impact net SW fluxes at the surface, despite associated increases in  $\alpha$  (Fig.5i - j). Changes in cloud properties induced by ship exhaust perturbations are expected to only lead to small changes in SW surface fluxes, due to the reduced solar fluxes based on the geographical location, and the comparatively large LWP, which leads to a substantial extinction of incoming SW radiation. Relatively small changes in  $\alpha$  are therefore only expected to lead to minor changes in SW surface fluxes.

Moreover, we add two additional figures to the appendix showing relative changes in net SW surface fluxes between high ship exhaust particle concentration cases and the respective baseline/reference cases (see Figures C1 and C2).

**A rounding mistake was found in the calculation of mean net SW values. The net SW value of WS\_hi has been changed from 6.4 to 6.3 in Table 2.**

4. *Fig.2: What is behind the periodic increases or bumps in IWP, which seem to come about earlier in the polluted cases than in “Mix”? Are they freezing events? The rain numbers seem to dip in the next figure, and in B2 the graupel has maxima... Do you think the warm phase changes could in turn make the polluted cases freeze out earlier?*

**Indeed, these sporadic spikes in IWP are associated with increased formation of graupel. The same phenomena has also been observed by Bulatovic et al. (2021), who used a very similar setup. Therein, the authors state that this is a result of strong collection rates of raindrops by graupel. In section 3.1 we added:**

Sporadic spikes in the temporal evolution of IWP are in all cases caused by increased graupel formation rates at the expense of raindrops. Similar features in IWP evolution are reported by Bulatovic et al. (2021) who used MIMICA with a similar setup.

5. *Fig.3: It takes my laptop a long time to render this figure, maybe you can rasterize it (also for the other heatmap figures)?*

**Fig. 3, B1 and B2 have been converted to PNG files reducing the manuscript file size and figure rendering times.**

6. *All figures: Green and red in the same panel (e.g. Fig.2) is not the most colourblind friendly choice. Consider changing.*

**Thank you for bringing this to our attention. We changed the color of all HiS\_sul cases to a more yellowish hue and updated all figures.**

## Review 2

*The manuscript explores the impact of ship emissions to a campaign-based Arctic cloud scene through large-eddy simulations. To mimic various ship exhaust technologies and their emissions, the authors impose aerosol particle size distributions informed by previous laboratory work and find microphysical responses that slightly alter clouds' condensate amount and emitted longwave radiation.*

*The overall manuscript is well written. I have a couple of concerns that the authors should address before publication.*

### *Major concerns*

*The title suggests a wider picture on Arctic clouds, but the manuscript focuses on a particular case. It is unclear, whether these results are representative for the wider Arctic. The authors should (1) put the selected case into perspective by using cloud statistics from Arctic observations, and (2) discuss potential impacts to clouds that have not been touched on here. I wonder if there are other cases of stronger cloud-aerosol-precipitation interaction, where the various aerosol scenarios make a more meaningful difference.*

**The reviewer raises a valid concern. Whereas the ASCOS case used in this study is based on observations made in the high Arctic, increased Arctic shipping activity will mostly occur in coastal regions, e.g., the Northeast Passage and the Northern Sea Route. This implies that ship exhaust emissions would perturb clouds of potentially different characteristics. This is one of the study's limitations because the model has not been adjusted or tested for such a case, yet. More observational data is required, which was beyond the scope of this study. We address this point and add to the conclusions:**

Consequently, it is important to highlight that the case study used in this study is based on observations made in the high Arctic. Most of Arctic shipping activity will likely occur closer to coastal regions where air masses are likely to be more strongly influenced by anthropogenic and biogenic activity (see, for example, Smith and Stephenson (2013)). This means that the atmospheric background conditions and cloud properties may vary from the mixed-phase cloud case studied here and will likely affect the impact of ship exhaust perturbations on cloud properties.

*Perhaps it also necessary to change the title to: "Potential impacts of marine fuel regulations on an Arctic stratocumulus case and its radiative response".*

**We agree that the manuscript title should more clearly reflect that this manuscript focuses on a specific Arctic cloud case which cannot not be used to generalize to all Arctic cloud types and therefore, cloud responses from ship exhaust perturbations. We think that the title suggested by the reviewer is an adequate adjustment and decided to change the title of the manuscript to:**

**Potential impacts of marine fuel regulations on an Arctic stratocumulus case and its radiative response**

*The description of simulations lacks important details: (1) Looking at Christiansen et al., (2020), there is a large-scale divergence imposed – is that the case here, too?*

The same large-scale divergence rate of  $1.5 \times 10^{-6} \text{ s}^{-1}$  is used in this study. We have expanded Section 2.2 by adding more information regarding the simulation setup:

The radiation solver used in this study is based on Fu and Liou (1992). It is important to note that while radiation is affected by cloud hydrometeors it is not affected by aerosols. Surface temperature and pressure have prescribed values of 269.8 K and 1026.3 hPa, respectively. The surface albedo is set to 0.844 and the surface roughness to 0.0004 m. Sensible and latent heat fluxes at the surface are both set to  $0 \text{ W m}^{-2}$  based on the small values reported in Tjernström et al. (2014). A large-scale divergence of  $1.5 \times 10^{-6} \text{ s}^{-1}$  is imposed over the whole domain. Large-scale advection is turned off in the model.

*(2) Furthermore, the authors show the vertical temperature profile and indicate that it's kept constant – is that achieved through nudging or advective tendencies and is either technique applied throughout or only in the free troposphere?*

Thank you for the comment, this was an unfortunate phrasing. Temperature actually does not stay constant throughout the simulation, but is rather a prognostic variable that is influenced by sources calculated in the model (radiation, latent heating/cooling, turbulent diffusion) and the large-scale divergence mentioned above. This is the case within the model domain. Above the domain, a constant temperature profile is used only for the radiation solver and this is literally constant throughout the simulation. We have clarified this in the manuscript:

Note that meteorological conditions from ASCOS were only used to initialize the model. Potential temperature and total water mixing ratio are prognostic variables influenced by sources and sinks in the model (e.g., radiation, microphysical phase changes, and precipitation), but do not necessarily represent the temporal evolution of the real atmospheric state.

*(3) The authors should also specify how they calculate turbulent surface fluxes.*

See response to the question regarding the large-scale divergence above.

*(4) How do the authors justify imposing ship-based aerosol uniformly rather than only within the marine boundary layer?*

It is true that assuming uniform ship-based aerosol may not be the most realistic representation of how ship exhaust emissions may perturb the stratocumulus cloud in this study. Initial tests with vertically constrained ship exhaust aerosol profiles revealed that the updraft in the domain was insufficient to fully mix aerosol particles into the cloud layer and therefore, inadequate to investigate the premise of the study. It should be noted that similar approaches were utilized in similar studies (e.g., Possner et al. (2017) and Eirund et al. (2019)). Ideally, ship exhaust plume height and dispersion estimations would yield the most realistic representation of ship exhaust perturbations. Nevertheless, this was not in the scope of this study but should be considered for future studies. This was addressed in the original manuscript (see ll. 393 - 397).

*The authors show a significant difference in longwave emissions but none in the shortwave spectrum. The latter is puzzling to me, and the authors should elaborate on why that is – are there perhaps compensating effects of cloud fraction and cloud albedo?*

**This question was also lifted by Reviewer 1. Please see our response to question 3 of Review 1, under “Specific comments”.**

*Minor concerns*

*ll. 108-110 Would it be possible to provide satellite imagery of this case (or at least coordinates) so that readers can obtain a visual impression of the case?*

**In ll. 177 - 178 we add:**

The simulated stratocumulus case is based on observations made during ASCOS on 31.08.2008 at approximately 87°N, 11°W [...]

*ll. 136ff (and also Fig. 1) It took me a while to understand the scenarios and their number of modes (and would expect the same for other readers). Perhaps it would be simpler to display all initial aerosol size distributions in Fig 1. I’m also not sure I understand the value of Fig. 1b – perhaps its better suited in the appendix?*

**In order to emphasize on the fact that engine experiments were performed using different engines and fuel types we added in ll. 142-143:**

Engine experiments summarized in Santos et al. (2024) utilized a different engine with higher power output and fuels with different properties compared to Santos et al. (2022, 2023) and therefore, resulted in different emission characteristics.

**We add the corresponding references to Fig. 1 a and b to make it more clear. Moreover, the colors of the individual particle size distributions and modes in Fig. 1 have been adjusted to match the case-specific color coding used in later figures.**

*l. 191 The label “mix” is confusing and should instead be labelled as “no ship”.*

**We agree with this statement. The “Mix” label has been renamed to “no\_ship”. The text and all figures have been adjusted correspondingly.**

*l. 381 “smaller” is ambiguous here.*

**The sentence has been rephrased and now reads:**

Transitions towards fuels with reduced sulfur content have been shown to lead to substantial reductions in CCN number emissions, which potentially could reduce radiative effects from ship aerosol-cloud interactions.

## References

J. Browse, K. S. Carslaw, A. Schmidt, and J. J. Corbett. Impact of future Arctic shipping on high-latitude black carbon deposition. *Geophysical Research Letters*, 40(16):4459–4463, 2013. doi: 10.1002/grl.50876.

- I. Bulatovic, A. L. Igel, C. Leck, J. Heintzenberg, I. Riipinen, and A. M. L. Ekman. The importance of Aitken mode aerosol particles for cloud sustenance in the summertime high Arctic – a simulation study supported by observational data. *Atmos. Chem. Phys.*, 21(5):3871–3897, 2021. doi: 10.5194/acp-21-3871-2021.
- M. W. Christensen, K. Suzuki, B. Zambri, and G. L. Stephens. Ship track observations of a reduced shortwave aerosol indirect effect in mixed-phase clouds. *Geophysical Research Letters*, 41(19):6970–6977, 2014. ISSN 19448007. doi: 10.1002/2014GL061320.
- S. Christiansen, L. Ickes, I. Bulatovic, C. Leck, B. J. Murray, A. K. Bertram, R. Wagner, E. Gorokhova, M. E. Salter, A. M. Ekman, and M. Bilde. Influence of Arctic Microlayers and Algal Cultures on Sea Spray Hygroscopicity and the Possible Implications for Mixed-Phase Clouds. *Journal of Geophysical Research: Atmospheres*, 125(19), 2020. doi: 10.1029/2020JD032808.
- S. B. Dalsøren, B. H. Samset, G. Myhre, J. J. Corbett, R. Minjares, D. Lack, and J. S. Fuglestad. Environmental impacts of shipping in 2030 with a particular focus on the Arctic region. *Atmospheric Chem. Phys.*, 13(4):1941–1955, 2013. ISSN 1680-7316. doi: 10.5194/acp-13-1941-2013.
- G. K. Eirund, A. Possner, and U. Lohmann. Response of Arctic mixed-phase clouds to aerosol perturbations under different surface forcings. *Atmospheric Chemistry and Physics*, 19(15):9847–9864, 2019. ISSN 1680-7324. doi: 10.5194/acp-19-9847-2019.
- H. C. Frostenberg, A. Welti, M. Luhr, J. Savre, E. S. Thomson, and L. Ickes. The chance of freezing – a conceptional study to parameterize temperature-dependent freezing by including randomness of ice-nucleating particle concentrations. *Atmospheric Chemistry and Physics*, 23(19):10883–10900, 2023. doi: 10.5194/acp-23-10883-2023.
- Q. Fu and K. N. Liou. On the correlated k-distribution method for radiative transfer in nonhomogeneous atmospheres. *Journal of Atmospheric Sciences*, 49(22):2139 – 2156, 1992. doi: 10.1175/1520-0469(1992)049<2139:OTCDMF>2.0.CO;2.
- A. Gilgen, W. T. K. Huang, L. Ickes, D. Neubauer, and U. Lohmann. How important are future marine and shipping aerosol emissions in a warming Arctic summer and autumn? *Atmospheric Chemistry and Physics*, 18(14):10521–10555, 2018. ISSN 1680-7324. doi: 10.5194/acp-18-10521-2018.
- X. Li, A. H. Lynch, D. A. Bailey, S. R. Stephenson, and S. Veland. The impact of black carbon emissions from projected Arctic shipping on regional ice transport. *Climate Dynamics*, 57(9-10):2453–2466, 2021. doi: 10.1007/s00382-021-05814-9.
- A. Possner, A. M. L. Ekman, and U. Lohmann. Cloud response and feedback processes in stratiform mixed-phase clouds perturbed by ship exhaust. *Geophysical Research Letters*, 44(4):1964–1972, 2017. ISSN 00948276. doi: 10.1002/2016GL071358.
- L. C. Smith and S. R. Stephenson. New Trans-Arctic shipping routes navigable by midcentury. *Proceedings of the National Academy of Sciences*, 110(13), 2013. doi: 10.1073/pnas.1214212110.

- S. R. Stephenson, W. Wang, C. S. Zender, H. Wang, S. J. Davis, and P. J. Rasch. Climatic Responses to Future Trans-Arctic Shipping. *Geophysical Research Letters*, 45(18):9898–9908, 2018. doi: 10.1029/2018GL078969.
- R. G. Stevens, K. Loewe, C. Dearden, A. Dimitrelos, A. Possner, G. K. Eirund, T. Raatikainen, A. A. Hill, B. J. Shipway, J. Wilkinson, S. Romakkaniemi, J. Tonttila, A. Laaksonen, H. Korhonen, P. Connolly, U. Lohmann, C. Hoose, A. M. L. Ekman, K. S. Carslaw, and P. R. Field. A model intercomparison of CCN-limited tenuous clouds in the high Arctic. *Atmospheric Chemistry and Physics*, 18(15):11041–11071, 2018. doi: 10.5194/acp-18-11041-2018.
- M. Tjernström, C. Leck, C. E. Birch, J. W. Bottenheim, B. J. Brooks, I. M. Brooks, L. Bäcklin, R. Y.-W. Chang, G. de Leeuw, L. Di Liberto, S. de la Rosa, E. Granath, M. Graus, A. Hansel, J. Heintzenberg, A. Held, A. Hind, P. Johnston, J. Knulst, M. Martin, P. A. Matrai, T. Mauritsen, M. Müller, S. J. Norris, M. V. Orellana, D. A. Orsini, J. Paatero, P. O. G. Persson, Q. Gao, C. Rauschenberg, Z. Ristovski, J. Sedlar, M. D. Shupe, B. Sierau, A. Sirevaag, S. Sjogren, O. Stetzer, E. Swietlicki, M. Szczodrak, P. Vaattovaara, N. Wahlberg, M. Westberg, and C. R. Wheeler. The Arctic Summer Cloud Ocean Study (ASCOS): Overview and experimental design. *Atmospheric Chem. Phys.*, 14(6):2823–2869, 2014. ISSN 1680-7324. doi: 10.5194/acp-14-2823-2014.

# Potential impacts of marine fuel regulations on an Arctic clouds stratocumulus case and its radiative feedbacks response

Luís Filipe Escusa dos Santos<sup>1,a</sup>, Hannah C. Frostenberg<sup>2</sup>, Alejandro Baró Pérez<sup>2</sup>, Annica M. L. Ekman<sup>3,4</sup>, Luisa Ickes<sup>2</sup>, and Erik S. Thomson<sup>1</sup>

<sup>1</sup>Department of Chemistry and Molecular Biology, University of Gothenburg, Gothenburg, Sweden.

<sup>2</sup>Department of Space, Earth and Environment, Chalmers University of Technology, Gothenburg, Sweden.

<sup>3</sup>Department of Meteorology, Stockholm University, Stockholm, Sweden.

<sup>4</sup>Bolin Centre for Climate Research, Stockholm, Sweden.

<sup>a</sup>now at: Department of Space, Earth and Environment, Chalmers University of Technology, Gothenburg, Sweden.

**Correspondence:** Luis F. E. d. Santos (luis.santos@chalmers.se) and Luisa Ickes (luisa.ickes@chalmers.se)

**Abstract.** Increased surface warming over the Arctic, triggered by increased greenhouse gas concentrations and feedback processes in the climate system, has been causing a steady decline in sea-ice extent and thickness. With the retreating sea-ice, shipping activity will likely increase in the future driven by economic activity and the potential for realizing time and fuel savings from transiting shorter trade routes. Moreover, over the last decade, the global shipping sector has been subject to regulatory changes, that affect the physicochemical properties of exhaust particles. International regulations aiming to reduce SO<sub>x</sub> and particulate matter (PM) emissions, mandate ships to burn fuels with reduced sulfur content or alternatively, use wet scrubbing as exhaust after-treatment when using fuels with sulfur contents exceeding regulatory limits. Compliance measures affect the physicochemical properties of exhaust particles and their cloud condensation nuclei (CCN) activity in different ways, with the potential to have both direct and indirect impacts on atmospheric processes such as the formation and lifetime of clouds. Given the relatively pristine Arctic environment, ship exhaust particle emissions could be a large perturbation to natural baseline Arctic aerosol concentrations. Low-level stratiform mixed-phase clouds cover large areas of the Arctic region and play an important role in the regional energy budget. Results from laboratory marine engine measurements, which investigated the impact of fuel sulfur content (FSC) reduction and wet scrubbing on exhaust particle properties, motivate the use of large eddy simulations to further investigate how such particles may influence the micro- and macrophysical properties of a stratiform mixed-phase cloud case observed during the Arctic Summer Cloud Ocean Study campaign. Simulated Simulations with diagnostic ice crystal number concentrations revealed that enhancements of ship exhaust particles predominantly affected the liquid-phase properties of the cloud and led to a decrease in liquid surface precipitation, increased cloud albedo and increased longwave surface warming. The magnitude of the impact strongly depended on ship exhaust particle concentration, hygroscopicity, and size where the effect of particle size dominated the impact of hygroscopicity. While low FSC exhaust particles were mostly observed to affect cloud properties at exhaust particle concentrations of 1000 cm<sup>-3</sup>, exhaust wet scrubbing already led to significant changes at concentrations of 100 cm<sup>-3</sup>. Additional simulations with cloud ice water path increased from  $\approx 5.5 \text{ g m}^{-2}$  to  $\approx 9.3 \text{ g m}^{-2}$ , show more muted responses to ship exhaust perturbations but revealed that exhaust perturbations may even lead to a slight radiative cooling effect depending on the microphysical state of the cloud. The regional

impact of shipping activity on Arctic cloud properties may, therefore, strongly depend on ship fuel type, whether ships utilize wet scrubbers, and ambient thermodynamic conditions that determine prevailing cloud properties.

## 1 Introduction

Maritime shipping is a significant source of atmospheric pollutants with wide-ranging impacts on human health (Corbett et al., 2007; Jonson et al., 2020; Liu et al., 2016) and the climate system (Lauer et al., 2007; Eyring et al., 2010; Lund et al., 2012, 2020). Quantifying the net impact of ship exhaust emissions on Earth's radiative budget is a challenging task, due to large spatial variability in atmospheric conditions and heterogeneity in air exhaust composition. While ships emit a substantial amount of greenhouse gases, such as CO<sub>2</sub>, the remaining constituents can vary substantially with the propulsion system and fuel type used by the individual vessel (Lack et al., 2009; Lack and Corbett, 2012; Lehtoranta et al., 2019). Whereas CO<sub>2</sub> emissions contribute to climate warming, the overall impact of particulate matter and SO<sub>2</sub> exhaust emissions is subject to a much larger uncertainty envelope.

Ship exhaust emissions of primary and secondary particles have been identified to lead to tens of thousands of premature deaths worldwide (Corbett et al., 2007). Regions that are particularly affected by these emissions include coastal areas and port cities, with high population densities, including parts of Europe and East Asia. Motivated by the harmful effects that ship exhaust particles have for human health, the International Maritime Organization (IMO) decided to introduce international marine fuel regulations, which primarily target a reduction of sulfur oxides (SO<sub>x</sub>). These regulations mandate that ship operators use marine fuels with fuel sulfur content (FSC) lower than 0.5 wt % effective globally and lower than 0.1 wt % in designated sulfur emission control areas (SECA), or utilize exhaust treatment systems to reduce emissions (IMO, 2008). Since low FSC fuels are generally associated with a higher cost than conventional, high FSC residual fuel oils (UNCTAD, 2022) wet scrubbing systems pose an economically attractive treatment alternative, which allows stakeholders to continue to use marine fuels with FSCs exceeding regulatory limits (IMO, 2008). Wet scrubbers are exhaust after-treatment systems, that utilize mists of seawater or chemically treated freshwater to remove SO<sub>x</sub> from ships' exhaust, and thus, prevent the formation of sulfur-containing, secondary aerosol particles (Oikawa et al., 2003; Andreasen and Mayer, 2007). While recent studies demonstrate that utilization of FSC-lean marine fuels generally reduces the amount of particles emitted by ships (Zetterdahl et al., 2016; Kuittinen et al., 2021; Seppälä et al., 2021), the impact of wet scrubbing on particle exhaust emissions is less well understood and subjected to a large variability (Fridell and Salo, 2016; Lehtoranta et al., 2019; Winnes et al., 2020; Yang et al., 2021; Jeong et al., 2023). Moreover, compliance alternatives, such as exhaust after-treatment systems, have been found to affect the physicochemical properties of exhaust particles in different ways, which also have implications for atmospheric processes and the net climate effect of shipping activity. Combustion of low FSC fuels often results in the emission of predominantly hydrophobic soot particles, leading to reduced emissions of cloud condensation nuclei (CCN) compared to higher CCN emissions from conventional, high FSC fuel combustion (Lack et al., 2009; Yu et al., 2020, 2023). In contrast, wet scrubbing has been found to alter the physicochemical properties of the particle emissions (Lieke et al., 2013; Santos et al., 2023, 2024). This can yield larger fractions of water-soluble content in the exhaust particle phase and a shift in particle size distributions to larger

particles compared to exhaust particle emissions from conventional, high FSC fuel combustion. Combustion particles from wet scrubbing require relatively low supersaturations to be activated into liquid droplets (Santos et al., 2023) which can lead to enhanced CCN number emissions at given supersaturations (Santos et al., 2023, 2024).

60 Shipping emissions are currently estimated to have a net cooling effect on the climate; higher exhaust particle number concentrations can lead to increased cloud reflectivity which dominates the warming effect of shipping-related CO<sub>2</sub> emissions (Lauer et al., 2007; Eyring et al., 2010; Lund et al., 2012, 2020). Ship tracks are the visible manifestation of ship exhaust perturbations on cloud properties, resulting in persistent, regionally constrained marine stratiform cloud features with increased cloud albedo (Coakley et al., 1987; Hobbs et al., 2000; Possner et al., 2018). The extent of ship tracks depends on the back-  
65 ground state of the boundary layer including meteorological parameters, the cloud fraction, and aerosol particle and CCN number concentrations (Coakley et al., 1987; Durkee et al., 2000; Hobbs et al., 2000). Observations along the coast of California have shown that the 0.1 wt % FSC limit, introduced in 2015 in SECAs, led to strong reductions in visible ship track formation (Gryspeerdt et al., 2019; Watson-Parris et al., 2022). While ship sulfate emissions are one key driver to ship track formation, FSC reduction policies may still lead to cloud perturbations. These cloud perturbations may be undetectable for some  
70 analysis techniques, resulting in an underestimate of shipping-induced radiative forcing (Gryspeerdt et al., 2019; Manshausen et al., 2022). With the introduction of the global 0.5 wt % FSC cap in 2020 and associated implications for exhaust particles, radiative cooling induced by ship exhaust emissions may be diminished. Studies investigating the impact of the 2020 0.5 wt % FSC cap have reported lower ship track formation frequencies and highlight the reduction in SO<sub>2</sub> emissions as key drivers for this observation (Gryspeerdt et al., 2019; Yuan et al., 2022; Watson-Parris et al., 2022). Therefore, IMO FSC regulations may  
75 imply a diminished radiative cooling from shipping emissions. However, the magnitude of diminished cooling may be subject to a systematic underestimate, as ship track visibility is strongly dependent on the clouds' background states (Gryspeerdt et al., 2019; Yuan et al., 2022; Watson-Parris et al., 2022).

One region where future shipping activity might lead to a strong climate feedback is the Arctic. The Arctic is experiencing unprecedented amplified surface warming compared to the global average, caused by a complex system of interacting processes  
80 within its climate system (Serreze and Francis, 2006; Serreze and Barry, 2011; Rantanen et al., 2022). Low-level mixed-phase clouds play a key role in the Arctic climate system (Morrison et al., 2012). Whereas low-level clouds generally lead to surface cooling, they tend to enhance surface warming in the Arctic throughout most of the year by trapping and re-emitting longwave radiation (Intrieri et al., 2002; Shupe and Intrieri, 2004). Enhanced surface warming in the Arctic promotes ice and snow melting and as a consequence, Arctic sea-ice extent and thickness have been in decline for the past decades (Screen and  
85 Simmonds, 2010; Serreze and Barry, 2011). This will likely grant ships easier access to exploration and extraction of natural resources and may enable the use of shorter trading routes through Arctic waterways, deviating from the more conventional and longer routes through the Suez and Panama Canals. The economic feasibility of Arctic shipping routes compared to traditional routes is debated (Lasserre and Pelletier, 2011). Nonetheless, shipping activity and related exhaust emissions are expected to increase significantly within the near future (Corbett et al., 2010; Paxian et al., 2010; Peters et al., 2011). In the Arctic, ambient  
90 particle number concentrations are relatively low compared to other regions of the Earth and thus, relatively small absolute increases in aerosol concentrations can substantially impact cloud formation and properties (Mauritsen et al., 2011; Bulatovic

et al., 2021). Ship emissions may therefore become a strong, localized aerosol source that could alter the properties of Arctic clouds and thereby the radiative budget.

Several studies have investigated the potential impacts of increased Arctic shipping activity on Arctic cloud properties (Christensen et al., 2014; Possner et al., 2017; Gilgen et al., 2018; Eirund et al., 2019). Ship aerosol emissions were observed to generate a shift towards the ice phase, reducing precipitation and increasing cloud albedo (Christensen et al., 2014; Possner et al., 2017). Possner et al. (2017) observed a noteworthy rise in liquid water content (LWC) when ship-emitted CCN surpassed  $1000 \text{ cm}^{-3}$ . However, results were inconclusive in determining whether ship emission-related changes were sufficient to impact Arctic warming rates (Christensen et al., 2014; Possner et al., 2017). Gilgen et al. (2018) modeled significant impacts on Arctic cloud properties from shipping when exaggerated future Arctic ship emission inventories were used, i.e., when Arctic shipping emissions for 2050 were increased by a factor of 10. In contrast, Stephenson et al. (2018) investigated the total climate impact from trans-Arctic shipping and found an increase in total cloud fraction and cloud liquid water path (LWP) due to CCN-enhancements from ship emissions, diminishing Arctic warming rates and exerting cooling rates on the order of  $1^\circ \text{ C}$  by the end of the 21st century. Eirund et al. (2019) highlight how underlying surfaces influence the properties of mixed-phase clouds and thus, the impact of additional CCN from ship exhaust emissions may be weakened or strengthened, depending on the ice cover.

Ship exhaust emissions also have the potential to exert radiative forcing via direct interactions between emitted particles and solar radiation, or via reduction of the surface albedo due to deposition of light-absorbing black carbon (BC) particles onto snow. A modelling study by Dalsøren et al. (2013) examined a number of direct and indirect processes related to shipping emissions and radiative processes. The study found significant seasonal variability for all processes and that direct sulfate aerosol interactions exert the largest radiative forcing (positive) out of all processes, i.e., a larger forcing than aerosol-cloud interactions. Given IMO's marine fuel policies, the impact of ship-related sulfate contributions may be subject to large uncertainties. In contrast, Gilgen et al. (2018) and Stephenson et al. (2018) found that radiative forcing induced by aerosol-cloud interactions outweighs forcing exerted by direct aerosol-radiation interaction and BC deposition onto snow. Similarly, Browse et al. (2013) and Li et al. (2021) report only minor contributions of BC deposition from shipping activity which would yield insignificant changes in radiative forcing and not contribute to accelerated sea ice loss. While these findings apply for the Arctic in general, surface albedo adjustments due to BC deposition may have stronger local constrained impacts, for example, in the sub-Arctic region (Browse et al., 2013).

The aim of our study is to investigate how ship exhaust particle perturbations influence the microphysical structure of an Arctic mixed-phase cloud and thereby its climate effect. We elaborate on the differences in different ship exhausts based on laboratory results (Santos et al., 2022, 2023, 2024). In this study, we use large-eddy simulation (LES) to simulate a well-characterized mixed-phase stratocumulus cloud observed during the Arctic Summer Cloud Ocean Study (ASCOS) campaign (Tjernström et al., 2012, 2014). We systematically perturb the aerosol concentrations in the model domain to explore the effect of different types of ship exhausts. Whereas previous studies investigating cloud perturbations caused by ship exhaust emissions, used simplistic representations of physicochemical properties of ship exhaust particles, herein, we utilize detailed exhaust particle information obtained from laboratory marine engine experiments where the impact of FSC reduction and

exhaust wet scrubbing on ship exhaust particle properties was examined (Santos et al., 2022, 2023, 2024). The model is initially run with an ambient background aerosol concentration only. Subsequent model simulations utilize several potential ship aerosol concentrations with different particle size distributions, densities, and hygroscopicities, mirroring the effects of FSC reduction and wet scrubbing. We evaluate the role of ship aerosol properties in affecting the cloud's LWP and ice water path (IWP), and the concentration of cloud droplets and raindrops. The results are used to calculate changes in surface precipitation, cloud drop effective radius, cloud albedo, and other cloud properties, which have implications for the radiative surface budget. Potential Arctic climate feedbacks from increased shipping activity, in the context of the adaption of different fuel types and propulsion technologies by ships, are discussed.

## 2 Methods

### 2.1 Laboratory pre-study - Physicochemical properties of ship exhaust aerosol

The experimental results used in this study are based on a series of laboratory experiments that were performed between 2019 and 2022 in Gothenburg, Sweden. More details on the laboratory experiments can be found in Santos et al. (2022, 2023, 2024). Engine experiments were performed using stationary, marine test-bed diesel engines, fuel types of varying sulfur content, a laboratory wet scrubber, and a range of gas and aerosol instrumentation quantifying physicochemical properties of exhaust particles. For the simulations with the MISU MIT Cloud and Aerosol (MIMICA) LES model, the following parameters are needed as input to describe the aerosol perturbation: particle size distributions, particle effective densities, and hygroscopicities. Particle size distributions were measured using Scanning Mobility Particle Sizers (SMPS). We describe average particle size distributions using the count median diameter (CMD) and the geometric standard deviation ( $\sigma_g$ ). Effective particle densities ( $\rho_{\text{eff}}$ ) were determined by coupled SMPS and Aerodynamic Aerosol Classifier (AAC) measurements and calculated following Tavakoli and Olfert (2014) and Santos et al. (2022, 2024). Exhaust particle hygroscopicities ( $\kappa$ ) were determined from size-selected CCN measurements, using a CCN counter (CCNc; CCN-100, Droplet Measurement Technologies (Roberts and Nenes, 2005)) and parameterizations by Petters and Kreidenweis (2007).

From Santos et al. (2022, 2023) we use results from measurements with high FSC fuel (HiS; HGO in the respective studies), one low FSC fuel (LoS; MGO in the respective studies), and seawater scrubbing experiments, performed in combination with HiS fuel combustion (WS; SWS in the respective studies). For the LES experiments, the results were simplified by assigning identical size distributions to HiS and LoS which did not display substantial differences during the respective measurement campaigns. The particle size distributions used in the model are shown in Fig. 1 a. Other results, which were used as input parameters, such as average case-dependent  $\rho_{\text{eff}}$  and  $\kappa$  values are listed in Table 1 and discussed further in Sect. 2.3.

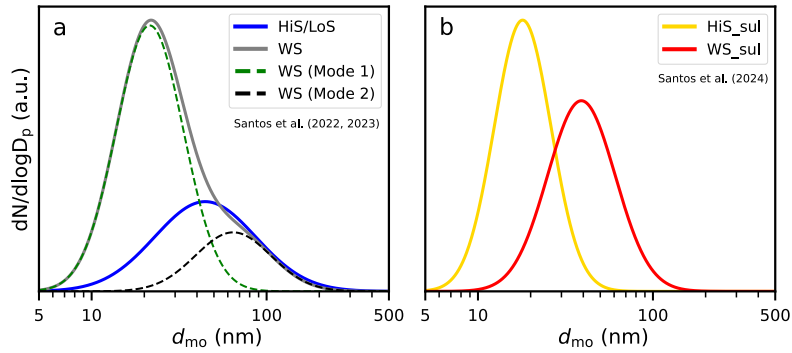

**Figure 1.** (a) Particle size distributions of high (HiS) and low sulfur content fuel (LoS), and wet scrubbed (WS) exhaust particles from Santos et al. (2022, 2023) and (b) the sulfate particle modes of HiS fuel (HiS\_sul) and scrubbed exhaust particles (WS\_sul) from Santos et al. (2024). The dashed lines in panel (a) represent the two individual modes of the bimodal WS case. The data shown in the figure represent size distributions measured during the respective measurement campaigns that have been averaged and simplified to be parameterized within MIMICA.

155 Engine experiments summarized in Santos et al. (2024) utilized a different engine with higher power output and fuels with different properties compared to Santos et al. (2022, 2023) and therefore, resulted in different emission characteristics. From Santos et al. (2024), only results obtained for high FSC fuel combustion and exhaust wet scrubbing at engine load points of 50% were implemented in this study. Both cases resulted in emissions of bimodal size distributions consisting of a dominant, hygroscopic sulfate mode and a smaller, relatively hydrophobic soot mode. Here, corresponding bimodal particle size distributions were simplified to the respective unimodal, hygroscopic sulfate modes. The dominant sulfate modes (Fig.1 b) with their  
160 respective averaged  $\rho_{\text{eff}}$  and  $\kappa$  values are summarized in Table 1. The high FSC case is referred to as HiS\_sul and the seawater wet scrubbing case as WS\_sul.

The main findings from Santos et al. (2022, 2023) showed that FSC reduction and exhaust wet scrubbing led to substantial impacts on particulate emissions from ship engines. A switch to marine fuels with reduced FSC did not significantly affect  
165 particle size distributions and total number emissions but decreased the exhaust particles'  $\rho_{\text{eff}}$  and  $\kappa$  values. On the other hand, wet scrubbing was found to lead to the formation of a dominant particle mode around 20 nm, and to increased  $\rho_{\text{eff}}$  and  $\kappa$  values, due to changes in the chemical mixing state. Similarly, Santos et al. (2024) investigated the impact of different fuel types and seawater exhaust wet scrubbing on exhaust particle properties, but used a different test-bed engine, with higher total power output. One key difference compared to Santos et al. (2022, 2023) was, that the combustion of non-compliant, high FSC fuel  
170 resulted in bimodal particle size distributions with a dominant sulfate mode around 20 nm. When the high FSC fuel exhaust was scrubbed, the sulfate mode was shifted towards larger sizes, likely due to the coagulation of particles inside the scrubber.

## 2.2 MIMICA model description and case setup

LES experiments were conducted with the MIMICA model. This model was originally designed to study high-latitude mixed-phase clouds and has been thoroughly documented and evaluated against observations (see e.g., Savre et al. (2015); Stevens

**Table 1.** Properties of marine background (BG) and ship aerosol used as model input parameters, including the count median diameter (CMD) and geometric standard deviation ( $\sigma_g$ ) of the size distributions, particle density ( $\rho_{\text{eff}}$ ) and aerosol hygroscopicity ( $\kappa$ ). HiS, LoS, and WS data were obtained from experiments outlined in Santos et al. (2022, 2023) and refer to combustion of high (HiS) and low FSC fuels (LoS), and wet scrubbed HiS exhaust (WS). HiS\_sul and WS\_sul represent the sulfate particle modes measured for high FSC fuel and wet scrubbed exhaust in Santos et al. (2024), respectively. The WS case is composed of a bimodal distribution, hence, the two separate aerosol modes are listed in the table. For each ship exhaust sensitivity test, two sets of simulations with either low or high ship aerosol number concentrations were performed. Corresponding simulations with low and high concentrations ( $N_p$ ) are additionally labeled with *\_lo* and *\_hi* respectively.

| Case        | CMD [nm] | $\sigma_g$ | $\rho_{\text{eff}}$ [g cm <sup>-3</sup> ] | $\kappa$ | $N_p$ [cm <sup>-3</sup> ] |
|-------------|----------|------------|-------------------------------------------|----------|---------------------------|
| BG (Ait)    | 32       | 1.1        | 2.18                                      | 1        | 30                        |
| BG (Acc)    | 93       | 1.5        | 2.18                                      | 1        | 30                        |
| LoS         | 45       | 1.6        | 0.91                                      | 0.04     | 100/1000                  |
| HiS         | 45       | 1.6        | 1.02                                      | 0.11     | 100/1000                  |
| WS (Mode 1) | 22       | 1.2        | 1.18                                      | 0.22     | 131.3/1313                |
| WS (Mode 2) | 64       | 1.3        | 1.09                                      | 0.16     | 36.7/367                  |
| HiS_sul     | 18       | 1.15       | 1.6                                       | 0.64     | 100/1000                  |
| WS_sul      | 39       | 1.22       | 1.6                                       | 0.64     | 100/1000                  |

et al. (2018); Bulatovic et al. (2023)). Herein, only a brief description of the model is provided. For more detailed information, see Savre et al. (2014).

MIMICA solves a set of anelastic, non-hydrostatic governing equations and uses a two-moment bulk microphysics scheme to predict mass mixing ratios ( $Q$ ) and number densities ( $N$ ) of five hydrometeor classes, including cloud droplets, raindrops, ice crystals, graupel, and snow. Growth of liquid-phase hydrometeors via auto-conversion, self-collection, and collision-coalescence are treated following Seifert and Beheng (2001) and Seifert and Beheng (2006). Interactions between liquid- and ice-phase hydrometeors are treated according to the two-moment bulk microphysics by Wang and Chang (1993). Hygroscopic growth of aerosol particles and activation into cloud droplets is calculated according to  $\kappa$ -Köhler theory (Petters and Kreidenweis, 2007). While MIMICA does include options for heterogeneous ice nucleation, here diagnostic ice crystal number concentrations ( $N_i$ ) are utilized as in Ovchinnikov et al. (2011, 2014). This means that in grid cells where the temperature ( $T$ ) is less than 0° C and sufficient supercooled cloud water is present ( $Q_c \geq 2 \times 10^{-7}$  g m<sup>-3</sup>),  $N_i$  is relaxed towards a pre-determined, constant value. As a default, this value for  $N_i$  was set to 200 m<sup>-3</sup> based on the control simulations in Stevens et al. (2018). The decision to use a constant diagnostic  $N_i$  instead of an interactive heterogeneous ice nucleation scheme was motivated by findings showing that typical engine exhaust particles, such as ~~black-carbon~~BC, are inefficient ice nucleators in the immersion freezing regime (Mahrt et al., 2018; Kanji et al., 2020). In addition, Santos et al. (2024) found no significant differences in the ice nucleation behavior of exhaust particles emerging from low and high FSC fuel combustion, and exhaust wet

scrubbing. ~~The radiation solver used in this study is based on Fu and Liou (1992). It is important to note that while radiation is affected by cloud hydrometeors it is not affected by aerosols.~~

The simulated stratocumulus case is based on observations made during ASCOS on 31.08.2008 at approximately 87°N, 11°W (see Appendix A with the detailed vertical profiles used to initialize the model; Tjernström et al., 2012, 2014). Note that  
195 ~~meteorological~~ meteorological conditions from ASCOS were only used ~~utilized~~ to initialize the model ~~and remain constant for the remaining simulation time. Thus, they do not.~~ Potential temperature and total water mixing ratio are prognostic variables influenced by sources and sinks in the model (e.g., radiation, microphysical phase changes, and precipitation), but do not necessarily represent the temporal evolution of the real atmospheric state. The case study represents a stable mixed-phase cloud that has previously been investigated using MIMICA (Igel et al., 2017; Stevens et al., 2018; Christiansen et al., 2020;  
200 Sotiropoulou et al., 2021; Frostenberg et al., 2023). For more details on the setup of MIMICA please see the aforementioned references, and for more extensive information on the ASCOS campaign and the experimental results see Tjernström et al. (2012, 2014).

The MIMICA 3-D domain consists of  $96 \times 96 \times 128$  grid cells with periodic boundaries. The horizontal resolution is uniform  $dx = dy = 62.5$  m while the grid spacing in the vertical  $z$ -direction is variable  $7.5 \text{ m} \leq dz \leq 25 \text{ m}$ . Higher vertical resolution  
205 is applied to grid cells near the surface and within the cloud layer, whereas a sinusoidal function is used to define the vertical spacing of grid cells at other altitudes. The total domain is  $6 \text{ km} \times 6 \text{ km}$  in the horizontal direction and  $1.7 \text{ km}$  in the vertical direction. All simulations were run for 16 h. The first 4 h are considered as spin-up and are thus excluded from the presented results.

The radiation solver used in this study is based on Fu and Liou (1992). It is important to note that while radiation is affected  
210 by cloud hydrometeors it is not affected by aerosols. Surface temperature and pressure have prescribed values of 269.8 K and 1026.3 hPa, respectively. The surface albedo is set to 0.844 and the surface roughness to 0.0004 m. Sensible and latent heat fluxes at the surface are both set to  $0 \text{ W m}^{-2}$  based on the small values reported in Tjernström et al. (2014). A large-scale divergence of  $1.5 \times 10^{-6} \text{ s}^{-1}$  is imposed over the whole domain. Large-scale advection is turned off in the model.

Additional simulations of ~~Mix~~no\_ship, HiS\_sul, and WS\_sul were performed with  $N_i$  increased from 200 to  $600 \text{ m}^{-3}$ . The  
215 aim of these additional simulations was to investigate the susceptibility of a thinner mixed-phase cloud, i.e., with reduced LWP and cloud depth, towards ship exhaust particle perturbations. A maximum value of  $N_i = 600 \text{ m}^{-3}$  as a large enough reduction in LWP was induced to perform aforementioned sensitivity tests and simultaneously, simulated LWP and IWP values agree well with observational data (see Sect. 3.4). Additional testing revealed that further increases in  $N_i$  would lead to dissipation of the cloud. Associated model runs are named as previous model runs but with an appended \_ni600, e.g., ~~Mix~~no\_ship\_ni600.

## 220 2.3 Aerosol implementation in MIMICA

Aerosol particles in MIMICA were represented as aerosol modes that follow lognormal distributions, described by a CMD and  $\sigma_g$ . To each aerosol mode, values of the aerosol effective density  $\rho_{\text{eff}}$ , the aerosol hygroscopicity expressed via  $\kappa$ , and the aerosol number concentrations ( $N_p$ ) were assigned. For all simulations, aerosol number concentrations and properties were set to be uniform and constant in time over the entire 3-D domain. Aerosol particles can be activated into cloud droplets according

225 to  $\kappa$ -Köhler theory but are modeled without additional sources and sinks during the simulations. Several aerosol modes can co-exist. In our simulations, we describe the total aerosol by natural background aerosol modes and ship exhaust aerosol modes (for the cases with additional ship exhaust particles).

Natural background aerosol (BG) concentrations were present in all model runs (Table 1). These BG aerosols were assumed to have hygroscopicity values in agreement with marine seaspray ( $\kappa = 1$ ) and were included in both the Aitken (Ait) and  
 230 accumulation mode (Acc). The  $N_p$  of the BG aerosol was chosen to be  $30 \text{ cm}^{-3}$  in both modes based on aerosol measurements during the ASCOS expedition (Kupiszewski et al., 2013). In the baseline simulation (referred to as Mixno ship), only BG Ait and Acc mode aerosol were present.

For the sensitivity experiments, different aerosol concentrations and types were added to represent different ship exhaust perturbations (HiS, LoS and WS from Santos et al. (2022, 2023), and HiS\_sul and WS\_sul from Santos et al. (2024)). Ship  
 235 aerosol properties are summarized in Table 1 and Sect. 2.1. For each case, ship exhaust perturbation experiments were performed at two concentration levels,  $N_{p,\text{ship}} = 100 \text{ cm}^{-3}$  (labeled with \_lo) and  $1000 \text{ cm}^{-3}$  (labeled with \_hi), respectively. An exception is the WS case where the concentration levels are increased by a factor of  $\approx 1.7$  following the increase in particle number concentration that has been observed in the experiments when using the wet scrubber. This increase in  $N_{p,\text{ship}}$  was accounted for in the two particle modes comprising the WS case. The same \_lo and \_hi labeling, signifying the low and high  
 240 concentration simulations, was used for WS cases.

## 2.4 Calculations of the cloud drop effective radius and cloud albedo

To examine the difference in cloud radiative properties between the simulations, we calculate the effective droplet radius ( $r_e$ ), cloud optical depth ( $\tau$ ), and cloud albedo ( $\alpha$ ) from the model output. To calculate the effective cloud droplet radius  $r_v$  we use the relationship as suggested by Freud and Rosenfeld (2012), who found that  $r_e$  is on average a factor 1.08 larger than the  
 245 volume mean cloud droplet radius  $r_v$ ,

$$r_e \approx 1.08 r_v . \quad (1)$$

The volume mean cloud droplet radius  $r_v$  is defined as,

$$r_v = \left( \frac{3}{4} \frac{Q_c}{\pi \rho_w N_c} \right)^{1/3} , \quad (2)$$

where  $Q_c$  is the cloud liquid water content,  $\rho_w$  is the density of water ( $1000 \text{ kg m}^{-3}$ ) and  $N_c$  is the cloud droplet number  
 250 concentration. The cloud's optical depth can be approximated by

$$\tau = \frac{3}{2} \frac{\text{LWP}}{r_e \rho_w} , \quad (3)$$

where LWP is the liquid water path, i.e., the vertically integrated amount of liquid cloud water, in  $\text{kg m}^{-2}$  (Stephens, 1978). The cloud albedo can be approximated with

$$\alpha = \frac{(1 - g)\tau}{1 + (1 - g)\tau} , \quad (4)$$

255 where  $g$  is the scattering asymmetry factor, i.e., the average value of the cosine of the scattering angle, and equals 0.85 for the scattering of solar radiation by clouds (Meador and Weaver, 1980).

### 3 Results

#### 3.1 Influence of ship aerosol on LWP and IWP

In Fig. 2, the time evolution of the domain-averaged LWP and IWP are shown for all the simulations in comparison to the observation from the ASCOS campaign. Note that ASCOS observations used to initialize the model do not change with time during the remaining simulation period. In all simulations, MIMICA simulates an LWP that exceeds the 75th percentile of the observations (Fig. 2 a - b) which was also observed by Bulatovic et al. (2021), who used MIMICA to simulate the same ASCOS case. MIMICA was previously reported to generate greater LWP when prescribed instead of interactive aerosol particle concentrations are used (Stevens et al., 2018). Additional sensitivity tests with reduced LWP are discussed in Sect. 3.4. The addition of ship aerosol tends to increase the LWP of the cloud compared to the reference ~~Mix-no ship~~ case (Fig. 2 a - b; Table 2). This effect is found to be dependent on the ship exhaust aerosol concentrations and the hygroscopicity of the ship exhaust aerosol. The LWP increase is most pronounced for sensitivity tests with high ship aerosol concentrations (HiS\_hi, WS\_hi, and WS\_sul\_hi), where LWP increases by up to  $\approx 13\%$ . The increase is less pronounced for both LoS cases due to the hydrophobic nature of the added particles ( $\kappa = 0.04$ ). Despite having comparatively large  $\kappa$ -values, both HiS\_sul cases do not yield any substantial increase in LWP, suggesting that the ship exhaust aerosol are too small (CMD = 18 nm) to induce a pronounced effect. The identified LWP response for the mixed-phase cloud perturbed by ship exhaust agrees with Possner et al. (2017), who reported substantial increases in LWP when ship-related CCN concentrations exceeded  $1000 \text{ cm}^{-3}$  in their simulations.

The simulated IWP is close to the 25th percentile of the observations for all simulations (Fig. 2 c - d). In contrast to results for the LWP, additional ship exhaust particles have no substantial effect on the modeled IWP which is due to the implementation of diagnostic  $N_i$ , meaning ship aerosol can not directly impact  $N_i$ . However, in our simulations, ship exhaust aerosol can affect the properties of precipitating ice-phase hydrometeors (graupel and snow) by influencing the accretion of hydrometeors and the availability of water vapor. Sporadic spikes in the temporal evolution of IWP are in all cases caused by increased graupel formation rates at the expense of raindrops. Similar features in IWP evolution are reported by Bulatovic et al. (2021) who used MIMICA with a similar setup. Small increases in IWP for some simulations are mainly caused by an increasing graupel number ( $N_g$ ) and mass concentration ( $Q_g$ ; Fig. D1).

#### 3.2 Impact of ship aerosol on hydrometeors

The effect of ship exhaust aerosol perturbations on the temporal evolution of cloud hydrometeors and cloud depth is investigated by examining horizontally averaged number and mass concentrations of cloud droplets ( $N_c$  and  $Q_c$ ) and raindrops ( $N_r$  and  $Q_r$ ). Corresponding contour plots for the reference simulation (~~Mix-no ship~~) and all sensitivity simulations with high ship aerosol

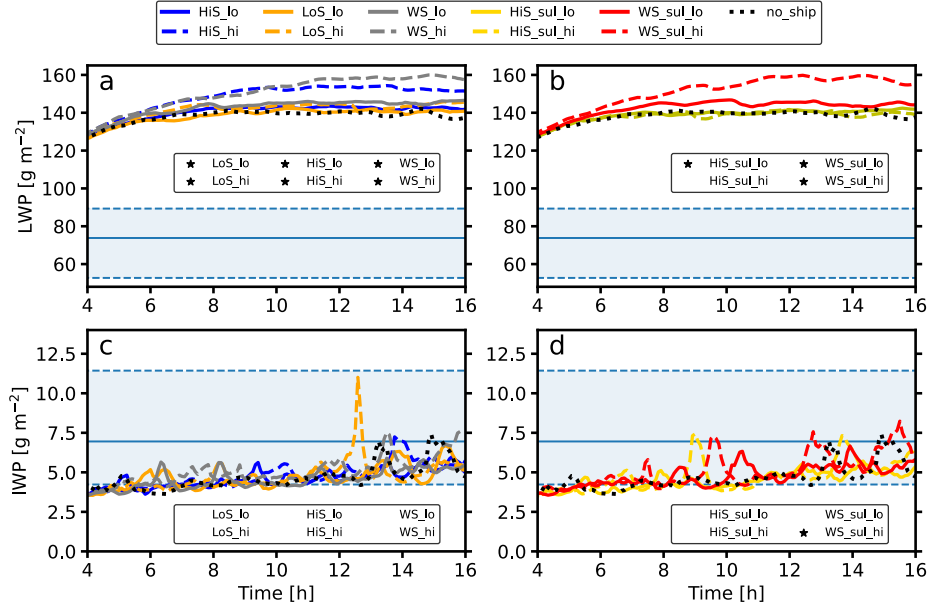

**Figure 2.** Time evolution of the simulated domain-averaged (a and b) liquid water path (LWP) and (c and d) ice water path (IWP). Mix-no\_ship refers to the reference case with background aerosol only. HiS, LoS, and WS represent ship aerosol from measurements of high and low sulfur content fuels and wet scrubbing respectively (Santos et al., 2022, 2023). The HiS\_sul and WS\_sul cases represent sulfate particle modes of high FSC fuel combustion and exhaust gas wet scrubbing from Santos et al. (2024). The label additions *\_lo* and *\_hi* signify the ship aerosol concentrations used in the individual model runs. Significant differences between ship exhaust cases and Mix-no\_ship were assessed using two-sided *t* tests at a confidence level of 95%. Model runs with significant differences are marked with star icons in inset legends. For the statistical tests the last 4 simulation hours were used. The blue shaded area refers to the retrieved LWP and IWP from microwave radiometer measurements (median over the observation period; the corresponding dashed lines are the 25th/75th percentiles) during the ASCOS campaign (Tjernström et al., 2012, 2014) which were used to initialize the model. The first four hours are considered a spin-up period of the model and are removed from the figures.

concentrations (*\_hi*;  $1000 \text{ cm}^{-3}$  or  $1680 \text{ cm}^{-3}$  (WS)) are shown in Fig. 3. In addition, each subplot features the horizontally averaged cloud bottom and cloud top height, depicted by the black dashed lines.

In general, impacts of ship aerosol particles on liquid-phase hydrometeors are mostly observed in ship aerosol simulations with the highest  $N_{p,\text{ship}}$  in accordance with the results presented in Sect. 3.1. Ice-phase hydrometeors have been excluded from Fig. 3, as changes in ice crystal concentrations remain more or less unaffected due to the prescribed ice parameterization scheme used in this study (see Sect. 2.2), but can be found in Appendix B. Whereas cloud droplet numbers are evenly distributed within the cloud layer,  $Q_c$  is highest near the cloud top, which is typical for stratocumulus clouds with near-adiabatic conditions. The distribution of  $N_r$  displays a more dynamic behavior and reaches its maximum after around 8 hours of simulation. In contrast to cloud droplets,  $Q_r$  is concentrated towards the lower regions of the cloud. All simulations show similar cloud depths and evolutions (Fig. 3). After 4 h (spin-up) the clouds have a depth of around 500 m. The cloud depth increases in all simulations

**Table 2.** Overview of mean LWP, IWP, surface precipitation rates, cloud effective radius ( $r_e$ ), cloud albedo ( $\alpha$ ), and net long- (Net LW) and shortwave radiation at the surface (Net SW) averaged over the last four hours of simulation time. Statistical significance, determined by performing two-side t-tests, is highlighted by asterisks. The label additions *\_lo* and *\_hi* signify the ship aerosol concentrations used in the individual model runs.

| Case                                | LWP<br>[g m <sup>-2</sup> ] | IWP<br>[g m <sup>-2</sup> ] | Surface precip. (Total)<br>[mm d <sup>-1</sup> ] | Surface precip. (Rain)<br>[mm d <sup>-1</sup> ] | $r_e$<br>[ $\mu$ m] | $\alpha$ | Net LW<br>[W m <sup>-2</sup> ] | Net SW<br>[W m <sup>-2</sup> ] |
|-------------------------------------|-----------------------------|-----------------------------|--------------------------------------------------|-------------------------------------------------|---------------------|----------|--------------------------------|--------------------------------|
| <del>Mix</del> <u>no_ship</u>       | 139.3                       | 5.5                         | 0.32                                             | 0.06                                            | 16.56               | 0.65     | -14.6                          | 6.5                            |
| LoS_lo                              | 140.7*                      | 5.3                         | 0.31                                             | 0.05                                            | 16.50               | 0.65*    | -14.5                          | 6.5                            |
| LoS_hi                              | 143.6*                      | 5.5                         | 0.30                                             | 0.04*                                           | 16.16*              | 0.66*    | -14.4*                         | 6.5                            |
| HiS_lo                              | 142.5*                      | 5.1                         | 0.31                                             | 0.06                                            | 16.41*              | 0.66*    | -14.5                          | 6.5                            |
| HiS_hi                              | 152.8*                      | 5.6                         | 0.28*                                            | 0.03*                                           | 15.41*              | 0.68*    | -14.2*                         | 6.4                            |
| WS_lo                               | 145.4*                      | 5.1                         | 0.30                                             | 0.06                                            | 16.22*              | 0.66*    | -14.4*                         | 6.5                            |
| WS_hi                               | 158.6*                      | 5.9                         | 0.27*                                            | 0.02*                                           | 14.68*              | 0.70*    | -13.9*                         | <del>6.4</del> <u>6.3</u>      |
| HiS_sul_lo                          | 141.0*                      | 5.0                         | 0.31                                             | 0.06*                                           | 16.57               | 0.65*    | -14.6                          | 6.5                            |
| HiS_sul_hi                          | 139.8                       | 5.4                         | 0.31                                             | 0.06                                            | 16.52               | 0.65     | -14.6                          | 6.5                            |
| WS_sul_lo                           | 144.6*                      | 5.4                         | 0.30                                             | 0.05*                                           | 16.10*              | 0.67*    | -14.4*                         | 6.5                            |
| WS_sul_hi                           | 158.0*                      | 6.2*                        | 0.29                                             | 0.02*                                           | 14.69*              | 0.70*    | -14.0*                         | 6.3                            |
| <del>Mix</del> <u>no_ship</u> ni600 | 88.6                        | 9.3                         | 0.35                                             | 0.00                                            | 15.51               | 0.57     | -17.6                          | 6.9                            |
| HiS_sul_lo_ni600                    | 86.6*                       | 9.4                         | 0.36                                             | 0.00                                            | 15.47*              | 0.57*    | -17.9*                         | 6.9                            |
| HiS_sul_hi_ni600                    | 85.8*                       | 9.4                         | 0.35                                             | 0.00                                            | 15.46*              | 0.57*    | -18.0*                         | 6.9                            |
| WS_sul_lo_ni600                     | 88.0*                       | 9.2                         | 0.34                                             | 0.00                                            | 14.94*              | 0.58*    | -17.9*                         | 6.9                            |
| WS_sul_hi_ni600                     | 86.8*                       | 9.6                         | 0.35                                             | 0.00                                            | 13.59*              | 0.60*    | -17.9*                         | 6.9                            |

and ranges between 535 m (~~Mix~~no\_ship) and 570 m (WS\_sul\_hi) at the end of the simulations due to steady increases in cloud top height.

With the addition of ship aerosol, more aerosol particles are activated into cloud droplets as can be seen from increased  $N_c$  values for LoS\_hi, HiS\_hi, WS\_hi, HiS\_sul\_hi and WS\_hi (Fig. 3 and Fig. 4). The largest increase is observed for WS\_hi and WS\_sul\_hi, where the vertically integrated  $N_c$  averaged over the last 4 simulation hours increases by  $\approx 57\%$ . Note that  $Q_c$  is almost unaffected by the added ship exhaust aerosol due to the low precipitation rates in the ~~Mix~~no\_ship case. Despite the relatively large  $\kappa$  value of HiS\_sul\_hi ship exhaust particles ( $\kappa = 0.64$ ),  $N_c$  and  $N_r$  are not strongly affected, even when ship exhaust aerosol concentrations are set to  $N_p = 1000 \text{ cm}^{-3}$ . This implies that HiS\_sul exhaust particles were too small (CMD = 18 nm) to act as CCN. The observed increase in  $N_c$  is also observed for LoS\_hi, suggesting that additional aerosol particles of low hygroscopicity ( $\kappa = 0.04$ ) can impact cloud properties, given their CMD is sufficiently large. Differences in modeled  $N_c$  between HiS\_sul\_hi and LoS\_hi ship exhaust aerosol imply that the size of aerosol particles plays a more dominant role in inducing changes in cloud properties than particle hygroscopicity. This observation agrees with Christiansen

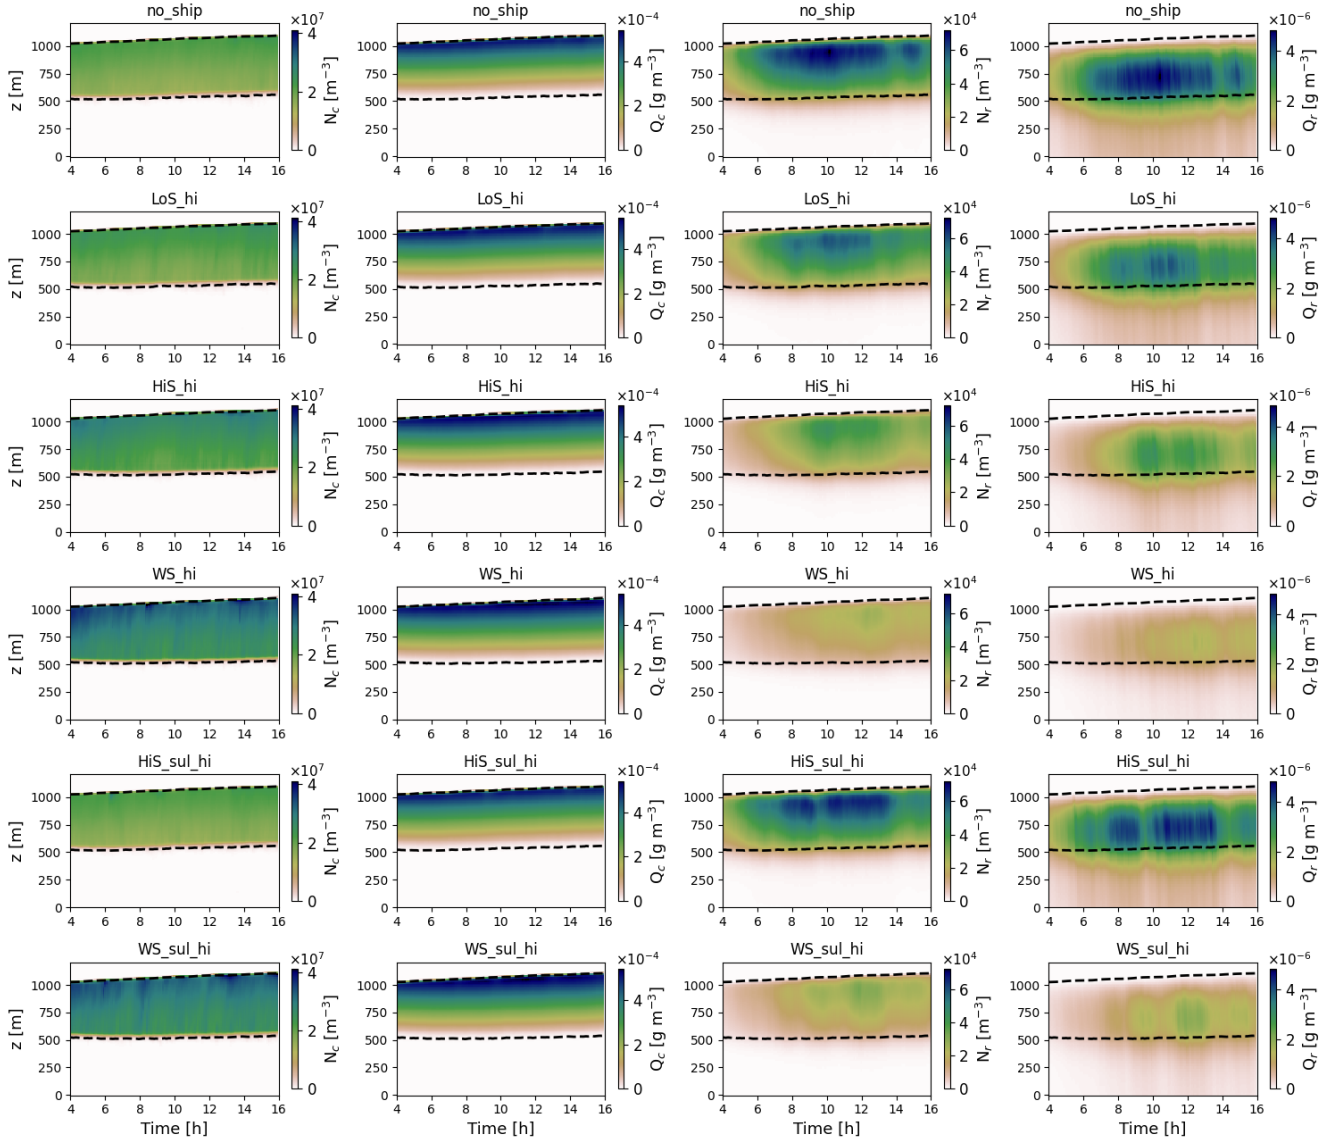

**Figure 3.** Temporal evolution of horizontal domain averaged cloud droplet number concentrations ( $N_c$ ;  $[N_c] = \text{m}^{-3}$ ), cloud droplet mixing ratios ( $Q_c$ ;  $[Q_c] = \text{g m}^{-3}$ ), raindrop number concentrations ( $N_r$ ) and raindrop mixing ratios ( $Q_r$ ) simulated for the reference case (**Mixno<sub>ship</sub>**) and the high ship aerosol concentration cases LoS\_hi, HiS\_hi, WS\_hi, HiS\_sul\_hi and WS\_sul\_hi. The black dashed lines represent case-specific, horizontally averaged cloud bottom and cloud top heights. The spin-up period (0 to 4 h) is removed from all figures.

et al. (2020), who simulated the same ASCOS case with background aerosol modes of varying size and hygroscopicity. Therein, the authors found microphysical cloud properties were not affected by aerosol particles' hygroscopicities if accumulation mode  
 310 particles were present in the model domain (Christiansen et al., 2020).

Vertical profiles of  $N_c$ ,  $Q_c$ ,  $N_r$ , and  $Q_r$  averaged over the last four simulation hours reveal a more detailed picture of how ship perturbations affect concentrations of cloud droplets and raindrops (Fig.4). The sensitivity tests that show substantial increases in  $N_c$  also show reduced raindrop formation in the cloud (Fig. 3 and Fig. 4). Whereas Mix-no\_ship produces substantial amounts of raindrops near the cloud top after about 6 to 7 h of simulation, ship cases with high exhaust particle concentrations lead to general reductions in  $N_r$  and  $Q_r$  by up to 58% and 63% respectively (Fig. 3 and Fig. 4). The magnitude of this response is dependent on the CMD and  $\kappa$ , where the CMD effect dominates the cloud response. The strongest reduction in  $N_r$  and  $Q_r$  is observed for WS\_hi and WS\_sul\_hi, where both quantities are reduced by about 52 to 58% ( $N_r$ ) and 56 to 63% ( $Q_r$ ) compared to Mix-no\_ship. Results for raindrop formation coincide with a general reduction in  $r_e$  for relevant ship exhaust cases. For both WS\_hi and WS\_sul\_hi,  $r_e$  is reduced from 16.56  $\mu\text{m}$  (Mix-no\_ship) to  $\approx 14.68 \mu\text{m}$  (Fig. 5 and Table 2). A reduction in  $r_e$  indicates reduced self-collection (autoconversion) and coalescence/accretion of cloud droplets by raindrops or other hydrometeors.

### 3.3 Impact of ship aerosol on surface precipitation and cloud radiative properties

The sensitivity tests that led to reductions in  $N_r$  and  $Q_r$  are not found to impact total surface precipitation rates compared to Mix-no\_ship (Fig. 5 a - b). The majority of surface precipitation is dominated by graupel which is not found to be affected by the addition of ship exhaust aerosol. Liquid rain typically constitutes less than 5% of the total surface precipitation (Table 2). Despite the relatively low absolute rates, rain surface precipitation rates are found to be reduced with additional ship exhaust aerosol, agreeing with tendencies in ship exhaust cases to produce smaller  $r_e$  (Fig. 5 c - d and Table 2). Changes in surface precipitation rates may significantly change with more realistic ice formation parametrizations. As a result, we cannot exclude whether emissions associated with shipping activity may extend cloud lifetimes due to potential reductions in total precipitation rates (Albrecht, 1989).

In order to estimate the potential climatic impact of increased Arctic shipping activity,  $\alpha$ , net short- (SW) and longwave (LW) radiative fluxes at the surface are characterized (Fig. 5 e - f and Table 2). Net radiative fluxes are calculated by subtracting net upwelling fluxes from net downwelling fluxes, hence, a negative value implies net outgoing radiation. At high latitudes, LW radiation generally has a larger influence on the surface energy budget compared to SW radiation, as solar radiation is limited outside the summer months. However, since the ASCOS case used in this study is based on observations from August, the net SW at the surface is also investigated.

With the exception of HiS\_sul\_hi, all ship sensitivity simulations tend to significantly increase  $\alpha$  compared to Mix-no\_ship (Fig. 5 e - f). This observation agrees with results shown in Fig. 4 and Fig. 5 c - d where tendencies towards generating larger  $N_c$  and reduced  $r_e$  values are shown. The largest increase in  $\alpha$  is observed for WS\_hi and WS\_sul\_hi where cloud albedo increases from 0.65 to 0.70. The changes in LWP and  $r_e$  induced by ship aerosol perturbations are also seen in the LW net radiative fluxes at the surface (Fig. 5 g - h).

Net LW fluxes at the surface are negative, meaning the net radiative LW flux is upwelling and therefore, cooling the surface. After about 5 h of simulation, net LW surface fluxes reach values of  $\approx -13 \text{ W m}^{-2}$  and eventually decrease to  $\approx -15 \text{ W m}^{-2}$  (Mix-no\_ship) and  $\approx -14.3 \text{ W m}^{-2}$  (WS\_hi) towards the end of the simulation. Ship cases, which are found to lead to the

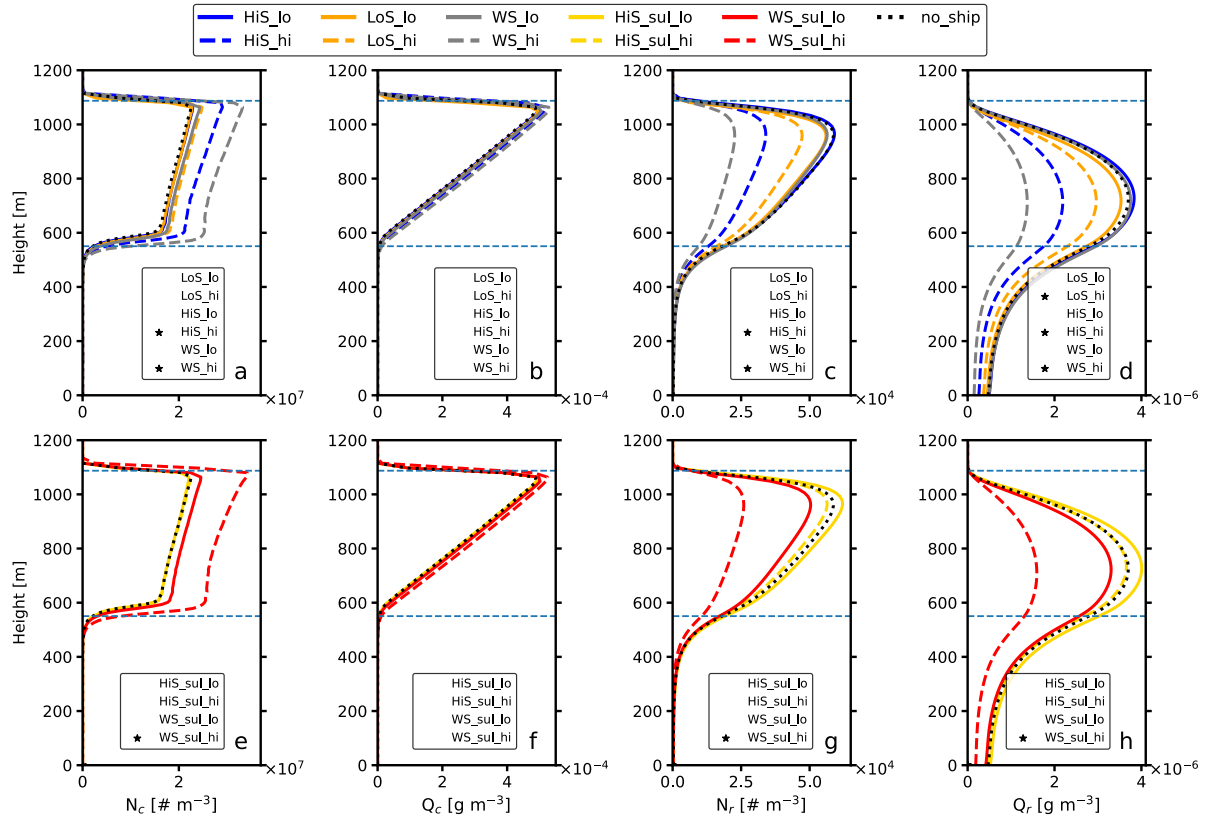

**Figure 4.** Vertical profiles of horizontally averaged (a and e)  $N_c$ , (b and f)  $Q_c$ , (c and g)  $N_r$  and (d and h)  $Q_r$ , averaged over the last four simulation hours. The light blue, dashed line represents the average cloud bottom and top height calculated for the reference case (~~Mix~~no\_ship). HiS, LoS, and WS represent ship aerosol from measurements of high and low sulfur content fuels and wet scrubbing respectively (Santos et al., 2022, 2023). The HiS\_sul and WS\_sul cases represent sulfate particle modes of high FSC fuel combustion and exhaust gas wet scrubbing from Santos et al. (2024). The label additions \_lo and \_hi signify the ship aerosol concentrations used in the individual model runs. Significant differences between ship exhaust cases and ~~Mix~~no\_ship were assessed using two-sided  $t$  tests at a confidence level of 95%. Model runs with significant differences are marked with star icons in inset legends.

largest increase in LWP (His\_hi, WS\_hi, and WS\_sul\_hi; Fig. 2 a - b), also reduce net LW cooling at the surface compared to ~~Mix~~no\_ship, i.e., net LW becomes less negative. Our results suggest that ship exhaust perturbations may lead to diminished surface LW radiative cooling and could therefore lead to enhanced surface warming, that is if the concentrations and size of the associated exhaust particle size distributions are sufficiently large to act as CCN. Similar relationships between increased LWP and a reduced LW radiative cooling ~~,was~~were also noted by Christiansen et al. (2020).

The net SW radiation is positive in all simulations, meaning the net flux is downwelling. In all simulations, the net SW fluxes initially increase until 6 h into the respective simulations where a maximum of around  $14 \text{ W m}^{-2}$  is reached. By the end of the simulations, net SW decreases to  $\approx 5 \text{ W m}^{-2}$ . The temporal trends in LW and SW radiation both coincide with the

solar angle. ~~However,~~ The results indicate that WS cases tend to slightly decrease the net SW (Table 2 and Figure C1), yet,  
none of the ship sensitivity tests are found to significantly impact net SW fluxes at the surface, despite associated increases  
355 in  $\alpha$  (Fig. 5 i - j), ~~which is expected given the relatively large LWP (Fig. 2 and Table 2).~~ Changes in cloud properties induced  
by ship exhaust perturbations are expected to only lead to small changes in SW surface fluxes, due to the reduced solar fluxes  
based on the geographical location, and the comparatively large LWP, which leads to a substantial extinction of incoming SW  
radiation. Relatively small changes in  $\alpha$  are therefore only expected to lead to minor changes in SW surface fluxes.

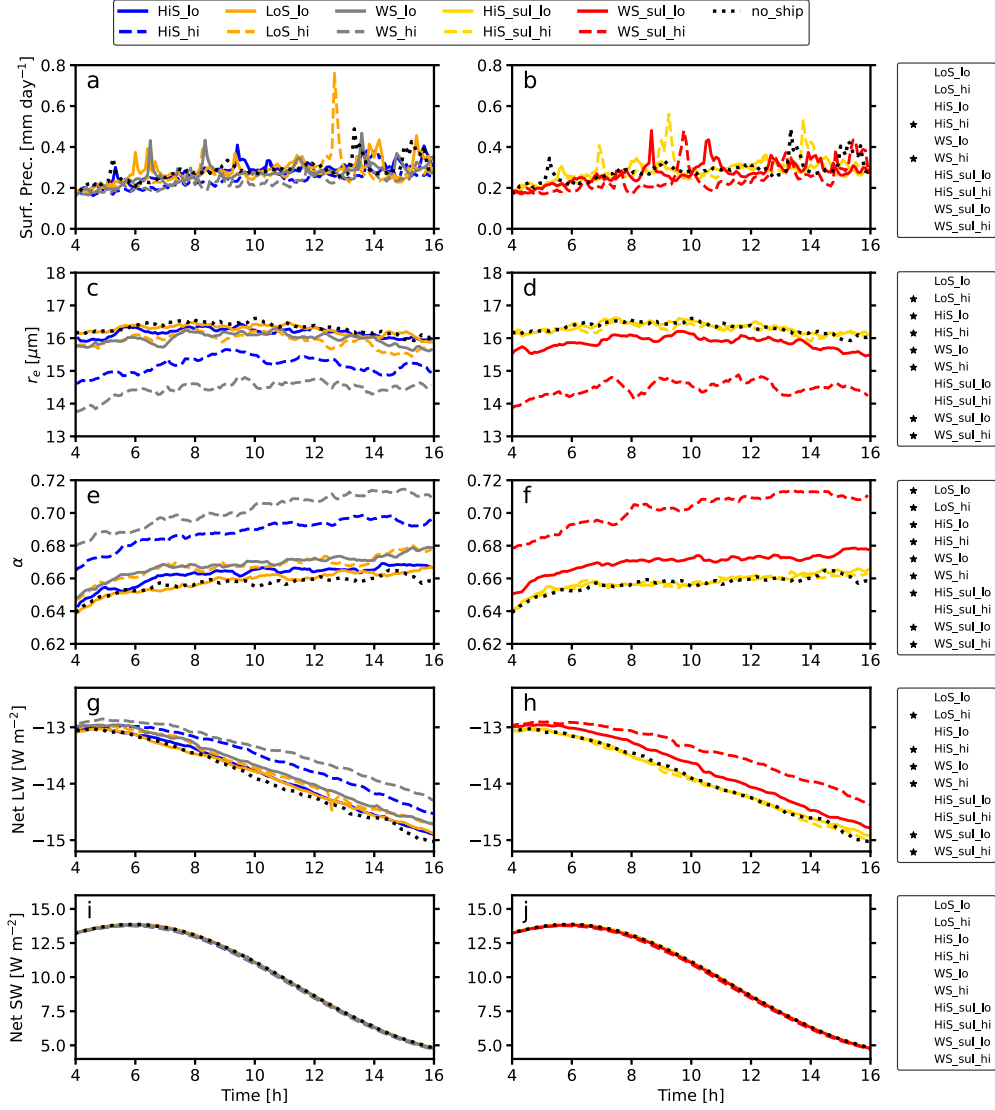

**Figure 5.** Time evolution of the simulated domain-averaged (a and b) surface precipitation, (c and d)  $r_e$ , (e and f)  $\alpha$ , (g and h) net longwave radiation at the surface (Net LW) and (i and j) net shortwave radiation at the surface (Net SW) for the set of simulations. Net radiative fluxes are calculated by subtracting the upwelling radiative flux from the downwelling flux (e.g.,  $LW_{\text{down}} - LW_{\text{up}}$ ), hence, a negative value implies net outgoing radiation. **Mix-no\_ship** refers to the reference case with background aerosol only. HiS, LoS, and WS represent ship aerosol from measurements of high and low sulfur content fuels and wet scrubbing respectively (Santos et al., 2022, 2023). The HiS\_sul and WS\_sul cases represent sulfate particle modes of high FSC fuel combustion and exhaust gas wet scrubbing from Santos et al. (2024). The label additions *\_lo* and *\_hi* signify the ship aerosol concentrations used in the individual model runs. Significant differences between ship exhaust cases and **Mix-no\_ship** were assessed using two-sided  $t$  tests at a confidence level of 95%. Model runs with significant differences are marked with star icons in right-hand side legends. The last 4 simulation hours were used to perform statistical tests.

### 3.4 Sensitivity to different levels of $N_i$

Additional simulations of Mixno\_ship, HiS\_sul, and WS\_sul were performed with  $N_i$  increased from 200 to 600  $\text{m}^{-3}$ . The aim of these additional simulations was to investigate the susceptibility of a thinner mixed-phase cloud, i.e., with reduced LWP and cloud depth, towards ship exhaust particle perturbations. When  $N_i$  is increased to 600  $\text{m}^{-3}$ , the LWP is reduced by  $\approx 45\%$  compared to Mixno\_ship and is close to the 75th percentile of the observational data (Fig. 6 a). IWP is increased by 3.8  $\text{g m}^{-2}$  ( $\approx 69\%$ ; comparison between Mix and Mixno\_ship and no\_ship ni600) and is also within the observed range (Fig. 6 b). With an increased  $N_i$ , ship exhaust particles do not lead to as strong perturbations in LWP ( $|\Delta\text{LWP}| < 3.2\%$ ) compared to sensitivity tests performed with  $N_i = 200 \text{ m}^{-3}$ . In fact, the ship exhaust sensitivity simulations display a tendency towards reducing the LWP compared to Mixno\_ship ni600 which is in contrast to the model runs with  $N_i = 200 \text{ m}^{-3}$  shown in Fig. 2. Such a muted response in LWP adjustments from additional ship exhaust particles was also reported by Possner et al. (2017) who found a suppressed LWP response from ship-related CCN emissions when the number of ice nucleating particles was increased. The IWP, on the other hand, is increased for Mixno\_ship ni600, HiS\_sul\_hi\_ni600 and WS\_sul\_hi\_ni600 compared to Mixno\_ship (Fig. 6 b) as all ice-phase hydrometeors increase substantially in number and mass concentrations (Fig. 7 c - e and h - j). As with the first set of simulations, ship exhaust perturbations do not significantly impact the IWP compared to the respective reference case, Mixno\_ship ni600 which, as previously discussed, is mainly due to the implementation of diagnostic  $N_i$ .

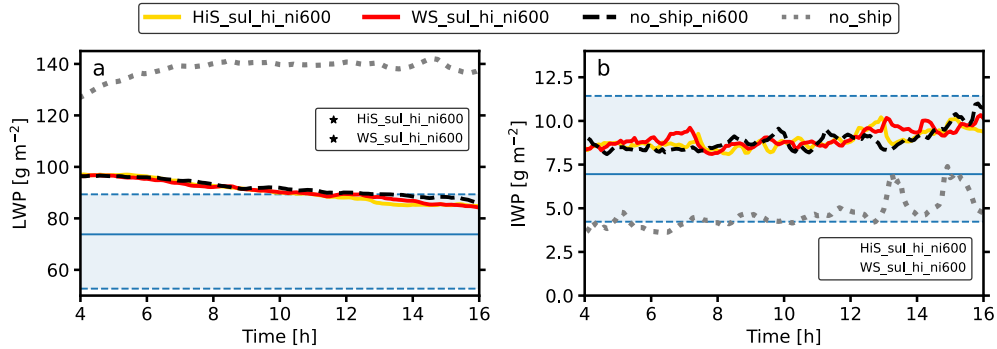

**Figure 6.** Time evolution of the simulated domain-averaged (a) liquid water path (LWP) and (b) ice water path (IWP). Figures show results for model runs where  $N_i$  was increased from 200 to 600  $\text{m}^{-3}$ . Model runs with increased  $N_i$  are labeled with \_ni600. The simulations are compared to the Mixno\_ship case where  $N_i = 200 \text{ m}^{-3}$ . The blue shaded area refers to the retrieved LWP and IWP from microwave radiometer measurements (median over the observation period; the corresponding dashed lines are the 25th/75th percentiles) during the ASCOS campaign (Tjernström et al., 2012, 2014). Only ship exhaust sensitivity cases with high concentrations (\_hi) are shown in the figure. Significant differences between ship exhaust cases and Mixno\_ship ni600 were assessed using two-sided  $t$  tests at a confidence level of 95%. Model runs with significant differences are marked with star icons in inset legends. The last 4 simulation hours were used to perform statistical tests. The first 4 hours are considered a spin-up period of the model and are removed from the figures.

Fig. 7 shows the impact on cloud depth and all hydrometeor classes for the \_ni600 simulations compared to Mixno\_ship (with  $N_i = 200 \text{ m}^{-3}$ ). The cloud depth is decreased, mostly due to adjustments in cloud bottom height, which increases by

$\approx 80$  m (Fig. 7). Taking into account the increase in cloud bottom height,  $N_c$  values are either similar (Mix\_no\_ship\_ni600, HiS\_sul\_hi\_ni600) or increased (WS\_sul\_hi\_ni600) compared to the respective Mix\_no\_ship values (Fig. 7 a). Simultaneously,  $Q_c$  values of all \_ni600 cases are reduced compared to Mixno\_ship, suggesting smaller cloud droplets in the cloud (Fig. 7 f). Raindrop number  $N_r$  and mass concentrations  $Q_r$  are significantly reduced compared to Mix\_no\_ship (Fig. 7 b - g), resulting from reduced auto-conversion of cloud droplets to raindrops and droplet coalescence efficiency, as well as enhanced scavenging of raindrops by graupel and snow, which display substantial concentration increases in all \_ni600 runs (Fig. 7 d - e and Fig. 7 i - j).

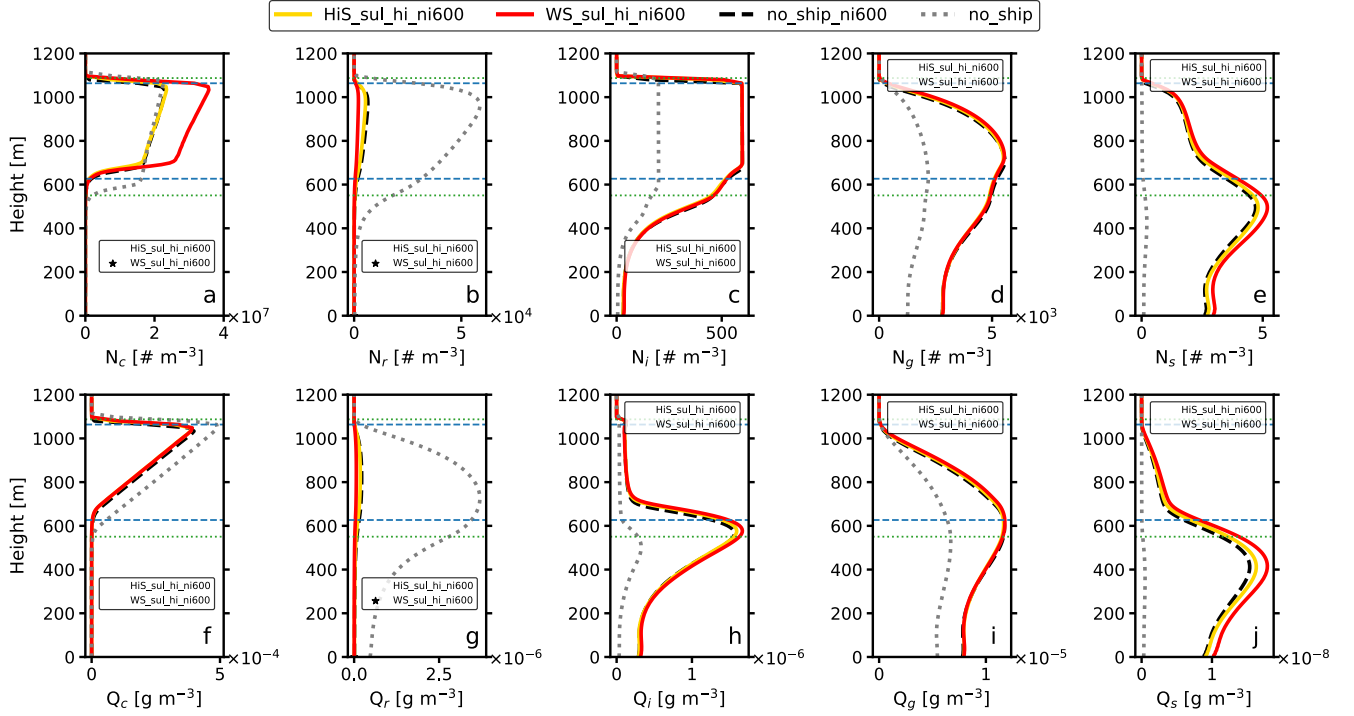

**Figure 7.** Vertical profiles of horizontally averaged (a)  $N_c$ , (b)  $N_r$ , (c)  $N_i$ , (d)  $N_g$ , (e)  $N_s$ , (f)  $Q_c$ , (g)  $Q_r$ , (h)  $Q_i$ , (i)  $Q_g$  and (j)  $Q_s$  averaged over the last four simulation hours for Mixno\_ship\_ni600, HiS\_sul\_hi\_ni600, WS\_sul\_hi\_ni600 and Mixno\_ship. The light blue, dashed line represents the average cloud bottom and top height calculated for Mixno\_ship\_ni600 (green, dotted line for Mixno\_ship respectively). The HiS\_sul and WS\_sul cases represent sulfate particle modes of high FSC fuel combustion and exhaust gas wet scrubbing. Significant differences between ship exhaust cases and Mixno\_ship\_ni600 were assessed using two-sided  $t$  tests at a confidence level of 95%. Model runs with significant differences are marked with star icons in inset legends.

Surface precipitation rates are slightly increased in the \_ni600 simulations compared to Mixno\_ship ( $< 10\%$ ; Table 2 and Fig. 8 a) which is due to enhancements in graupel formation (Fig. 7 d and i). Liquid-phase surface precipitation rates are small and negligible for all \_ni600 simulations. Average cloud drop effective radii  $r_e$  values are reduced by  $\approx 1 \mu\text{m}$  compared to the respective simulations with  $N_i = 200 \text{ m}^{-3}$  agreeing with observed reductions in LWP (Fig. 6 a) and  $Q_c$  (Fig. 7 f). The

reductions in LWP and  $\alpha$  are both reflected in the net radiative fluxes at the surface. Net LW radiative fluxes at the surface are reduced by at least  $2 \text{ W m}^{-2}$  compared to Mix-no-ship, meaning that reductions in LWP and cloud depth lead to reduced re-emission of LW radiation to the surface (Fig. 8 d). Respective \_ni600 ship exhaust cases tend to reduce net LW at the surface further, suggesting that in these instances ship exhaust perturbations would yield a slight net cooling effect. This is in contrast to the results shown in Sect. 3.3 where ship exhaust perturbations reduced net outgoing LW radiation at the surface. Relative reductions in  $\alpha$  for \_ni600 cases are reflected in net SW fluxes at the surface. In comparison to Mix-no-ship, net SW is on average increased by  $\approx 0.5 \text{ W m}^{-2}$  compared to Mix-no-ship (Fig. 8 e and Table 2). Nevertheless, additional ship exhaust particles do not significantly alter net SW radiative surface fluxes (Figure C2).

395 In summary, the results shown in this section demonstrate that the impact of ship exhaust particles on clouds and the surface radiative budget does not only depend on the ship exhaust particles themselves. The sensitivity is also strongly dependent on the background state of the atmosphere and the background cloud properties, such as cloud thickness. Interestingly, ship exhaust perturbations can have opposite effects on certain cloud parameters and net radiative fluxes. The most striking difference is that ship emissions tend to decrease the LWP and enhance net outgoing LW radiative surface fluxes when  $N_i = 600 \text{ m}^{-3}$ , whereas

400 the opposite is obtained when  $N_i = 200 \text{ m}^{-3}$ .

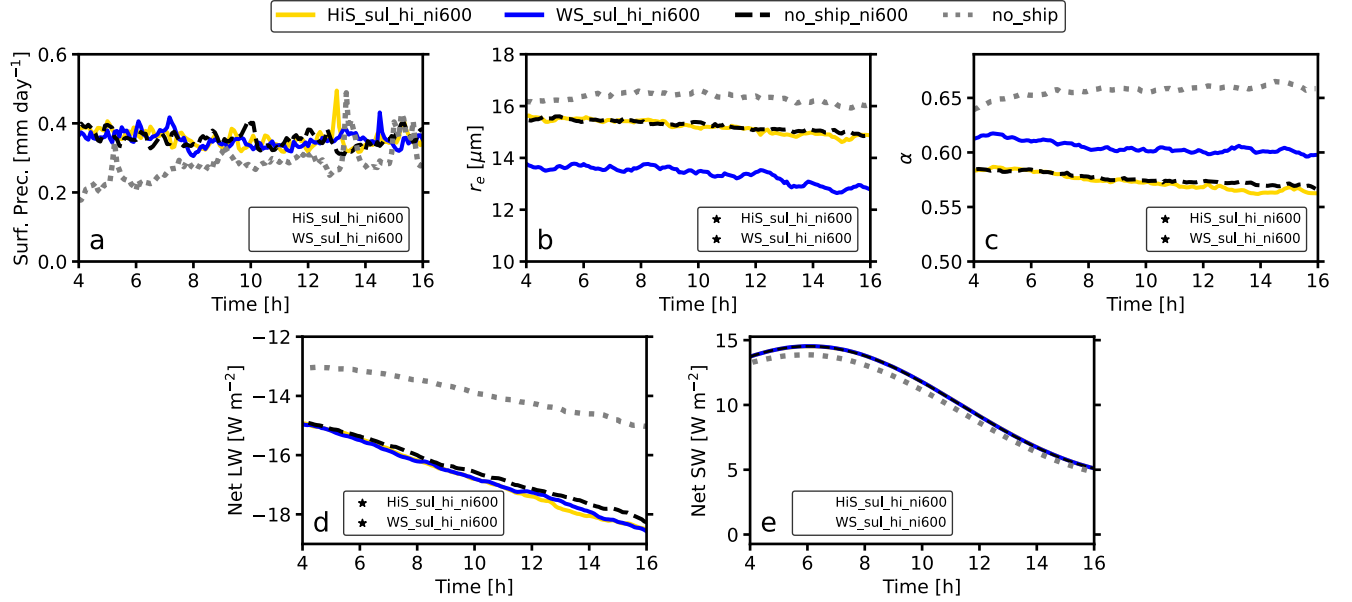

**Figure 8.** Time evolution of the simulated domain-averaged (a) surface precipitation rates, (b)  $r_e$ , (c)  $\alpha$ , (d) net longwave radiation at the surface (Net LW) and (e) net shortwave radiation at the surface (Net SW) for a set of simulations with  $N_i = 600 \text{ m}^{-3}$  (\_ni600) and the Mix-no\_ship case ( $N_i = 200 \text{ m}^{-3}$ ). Net radiative fluxes are calculated by subtracting the upwelling radiative flux from the downwelling flux (e.g.,  $\text{LW}_{\text{down}} - \text{LW}_{\text{up}}$ ), hence, a negative value implies net outgoing radiation. Mix-no\_ship refers to the reference case with background aerosol only. The HiS\_sul and WS\_sul cases represent sulfate particle modes of high FSC fuel combustion and exhaust gas wet scrubbing from Santos et al. (2024). Only ship exhaust sensitivity cases with high concentrations (\_hi) are shown in the figure. Significant differences between ship exhaust cases and Mix-no\_ship\_ni600 were assessed using two-sided  $t$  tests at a confidence level of 95%. Model runs with significant differences are marked with star icons in inset legends. The last 4 simulation hours were used to perform statistical tests.

## 4 Discussion

In general, ship emissions can lead to more but smaller liquid droplets in the mixed-phase clouds studied here. This means that even if the clouds contain more liquid water, rain surface precipitation is reduced. Nevertheless, this response was strongly coupled to the cloud IWP which is an indicator for the cloud thickness. In our case study, total surface precipitation rates are dominated by graupel which is not significantly affected by additional ship aerosol particles. Moreover, ship exhaust emissions have the potential to affect cloud radiative processes that play a vital role in the Arctic climate system. While the shortwave radiative budget is mostly unaffected, ship exhaust perturbations can lead to both reductions and increases in net longwave radiative cooling at the surface and potentially impact the net surface radiative budget. The magnitude of the ship exhaust-induced cloud perturbations is strongly dependent on the number concentrations of the particle emissions. It is also affected more by the size of the exhaust particles than by their hygroscopicity. This means that the impact of ship emissions on Arctic cloud properties would depend strongly on the fuel types used and whether exhaust after-treatment systems like scrubbers are used. Uncertainties in Arctic fuel type projections increase the challenge of constraining regional climate impacts from Arctic shipping. Transitions towards fuels with reduced sulfur content ~~generally yield smaller CCN~~ have been shown to lead to substantial reductions in CCN number emissions, which potentially could reduce radiative effects from ship aerosol-cloud interactions. This is due to a reduction in hygroscopicity of the ship exhaust particles ~~(Santos et al., 2023)~~ (Santos et al., 2023, 2024) and a shift in the particle size distribution towards smaller sizes (decreasing CMD; Lack et al., 2011; Yu et al., 2020, 2023). From June 2025 ships will no longer be allowed to carry and use fuel oils with densities and viscosities exceeding predefined limits (IMO, 2021), which could have ramifications for wet scrubber usage, as these systems are mainly designed for use with high FSC residual fuels. Moreover, due to environmental concerns associated with increased Arctic shipping activity, Canada and several organizations have proposed ~~black-carbon-BC~~ black-carbon-BC emission control areas for Arctic waters, that include mandates for low FSC distillate fuel usage for ships operating in the Arctic (IMO, 2023b, a). Assuming that these proposals are ratified, they would limit the allowed Arctic ship fuels and thus, facilitate estimating the climate impact from shipping. In this case, other environmental impacts from shipping such as BC deposition on snow surfaces, which reduces the surface albedo and enhances surface warming, could play a larger role and dominate the climate impact from Arctic shipping.

Ship exhaust particle concentrations above  $1000\text{ cm}^{-3}$  are realistic if one considers narrower and more localized regions where ship exhaust particles perturb clouds (Hobbs et al., 2000; Possner et al., 2018). Once emitted by a transiting ship, exhaust particles become dispersed in the atmosphere, resulting generally in smaller particle number concentrations. As a result, perturbations would likely exert changes in cloud properties more akin to our low concentration model runs. One area of focus for future research could be to implement ship plume dispersion and to use more realistic vertical exhaust particle concentration profiles. Moreover, exhaust particles will undergo chemical and physical transformations in the atmosphere associated with ship exhaust plume aging. In aged plumes, changes in particle size distributions are often observed due to coagulation of exhaust particles, and condensation and evaporation of water vapor and other atmospheric substances (Petzold et al., 2008; Celik et al., 2020). If, for example, fewer but larger particles are present, it could have a stronger impact on cloud hydrometeors compared to the ship exhaust particle size distributions and number concentrations implemented in this study.

435 While this study focuses on Arctic shipping and clouds, IMO FSC regulations apply worldwide. This means that global ship exhaust emissions are subject to changes and thus, the global radiative forcing exerted by ship exhaust emissions will likely change. It is therefore important to improve our general understanding of the potential effects of FSC reduction and wet scrubbing on particulate matter emissions and what this implies for cloud and climate processes.

## 5 Conclusions

440 In this study, we used LES together with aerosol data from laboratory experiments to examine the potential impact of ship exhaust particles on Arctic mixed-phase cloud properties. The laboratory experiments investigated the impacts of fuel sulfur content reduction and exhaust wet scrubbing on the physicochemical properties of ship exhaust particles (Santos et al., 2022, 2023, 2024). Wet scrubbing and FSC reduction represent regulatory compliance measures in the maritime shipping sector, which affect ship exhaust particle emissions and could potentially be utilized by ships in the Arctic. Given the projected  
445 increase in Arctic shipping activity due to strongly declining Arctic sea-ice extent and the availability of shorter trans-Arctic transportation routes, we have sought to illuminate how ship emissions may impact Arctic clouds and thereby affect the regional radiative balance.

The simulations were done for a persistent stratiform mixed-phase cloud, based on observations from the ASCOS campaign (Tjernström et al., 2012, 2014) and previous simulations (Igel et al., 2017; Stevens et al., 2018; Christiansen et al., 2020;  
450 Sotiropoulou et al., 2021; Frostenberg et al., 2023). The simulated cloud was subsequently perturbed by adding ship exhaust particle profiles into the model domain. A selected number of model runs were repeated with increased pre-fixed  $N_i$  to study the impact of ship exhaust perturbations on a thinner baseline cloud with increased IWP and reduced LWP.

Ship exhaust simulations revealed potential impacts on cloud droplet and raindrop concentrations, affecting the LWP and decreasing the cloud drop effective radius. Total surface precipitation was found to be mostly unaffected; liquid-phase precip-  
455 itation was reduced, but it was only a minor constituent of total surface precipitation. Moreover, the cloud albedo increased marginally in all ship exhaust experiments. Our first set of simulations, with  $N_i$  concentrations in line with observations and IWP values at the lower end of the retrieved values, demonstrated that ship exhaust perturbations can lead to a reduction in longwave radiative cooling at the surface of up to  $4.8 \text{ W m}^{-2}$ . This result implies that ship emissions may lead to a net warming effect compared to our baseline simulation without ship exhaust aerosol. The magnitude of the surface radiation change  
460 depended on the hygroscopicity and the CMD of the added ship aerosol particles, where the effect of the CMD was most important. Additional sensitivity tests with  $N_i$  increased to  $600 \text{ m}^{-3}$ , with reduced LWP and increased IWP (both in line with retrieved values), revealed that ship exhaust perturbations may lead to enhanced surface radiative cooling. This demonstrates that the net effect of ship exhaust emissions on the radiative forcing exerted by Arctic low-level clouds would not only strongly depend on the prevalent fuel types, and whether ships in the Arctic utilize wet scrubbers for exhaust after-treatment, but also  
465 on the prevalent atmospheric conditions and cloud properties. Studies have shown that Arctic low-level cloud properties are strongly coupled to the surface properties, and that sea-ice free conditions can lead to generally larger cloud fractions and

increased LWP (Barton and Veron, 2012; Taylor and Monroe, 2023). It is therefore likely that future Arctic low-level cloud properties may be more similar to our first case ( $N_i = 200 \text{ m}^{-2}$ ).

470 Bulatovic et al. (2021) showed large variations in cloud microphysical properties for different background aerosol concentrations and sizes. Results of ship exhaust perturbations may therefore vary substantially with different background aerosol concentrations and thus, the microphysical structure of the perturbed cloud, as demonstrated by our additional set of simulations with increased  $N_i$ . ~~The~~ Consequently, it is important to highlight that the case study used in this study is based on observations made in the high Arctic. Most of Arctic shipping activity will likely occur closer to coastal regions where air masses are likely to be more strongly influenced by anthropogenic and biogenic activity (see, for example, Smith and Stephenson (2013)). This  
475 means that the atmospheric background conditions and cloud properties may vary from the mixed-phase cloud case studied here and will likely affect the impact of ship exhaust perturbations on cloud properties. Moreover, the enhanced warming that the Arctic is experiencing will likely change the state of ambient aerosol concentrations due to biogenic and anthropogenic processes (Schmale et al., 2021). For example, more open sea surface area will lead to enhanced new particle formation due to marine biogenic emissions (Dall'Osto et al., 2017). General low ambient aerosol number concentrations mean that already  
480 small increases in concentrations can have large impacts on cloud properties (Mauritsen et al., 2011). It is therefore expected that these changes will also affect the properties of Arctic clouds.

Our collective results do show evidence that Arctic shipping emissions can lead to alterations in the micro- and macrophysical state of persistent Arctic low-level mixed-phase clouds. While a stronger tendency towards enhanced surface warming from ship exhaust emissions was obtained, this effect was mostly observed when ship aerosol concentrations were increased  
485 by  $N = 1000 \text{ cm}^{-3}$ . When low ship exhaust particle concentrations ( $N = 100 \text{ cm}^{-3}$ ) were utilized, only wet scrubbing model runs were found to alter cloud radiative properties significantly compared to the baseline. However, given the ban on carriage and usage of high-density/viscosity residual fuel oils in 2025, wet scrubbing might not be utilized by a large fraction of ships in the Arctic (IMO, 2021).

This study may help in constraining possible climate feedbacks from a projected increase in Arctic shipping activity. How-  
490 ever, our results show that more information on future Arctic shipping activity, including fuel types, traffic volume and associated emissions characteristics, prevalent meteorological conditions, and cloud types is required for more accurate estimates.

*Data availability.* Model output data will be made available on an open access database. The experimental data utilized in this study has been previously published and made available through the cited publications, Santos et al. (2022, 2023, 2024).

## Appendix A: Meteorological parameter of ASCOS case

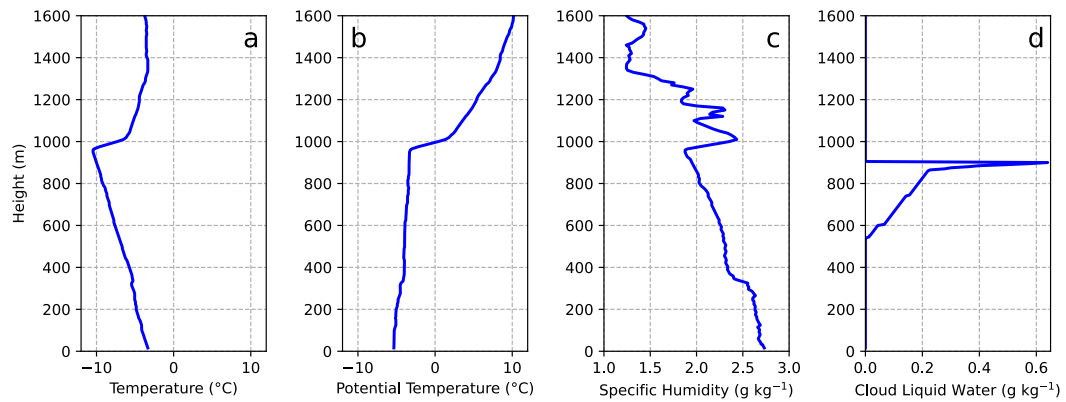

**Figure A1.** Radiosonde observations of (a) temperature, (b) potential temperature, (c) specific humidity and (d) derived cloud liquid water based on radiometer measurements performed on August 31st 2008 during the ASCOS campaign (Tjernström et al., 2012, 2014). The data was used to initialize MIMICA in this study.

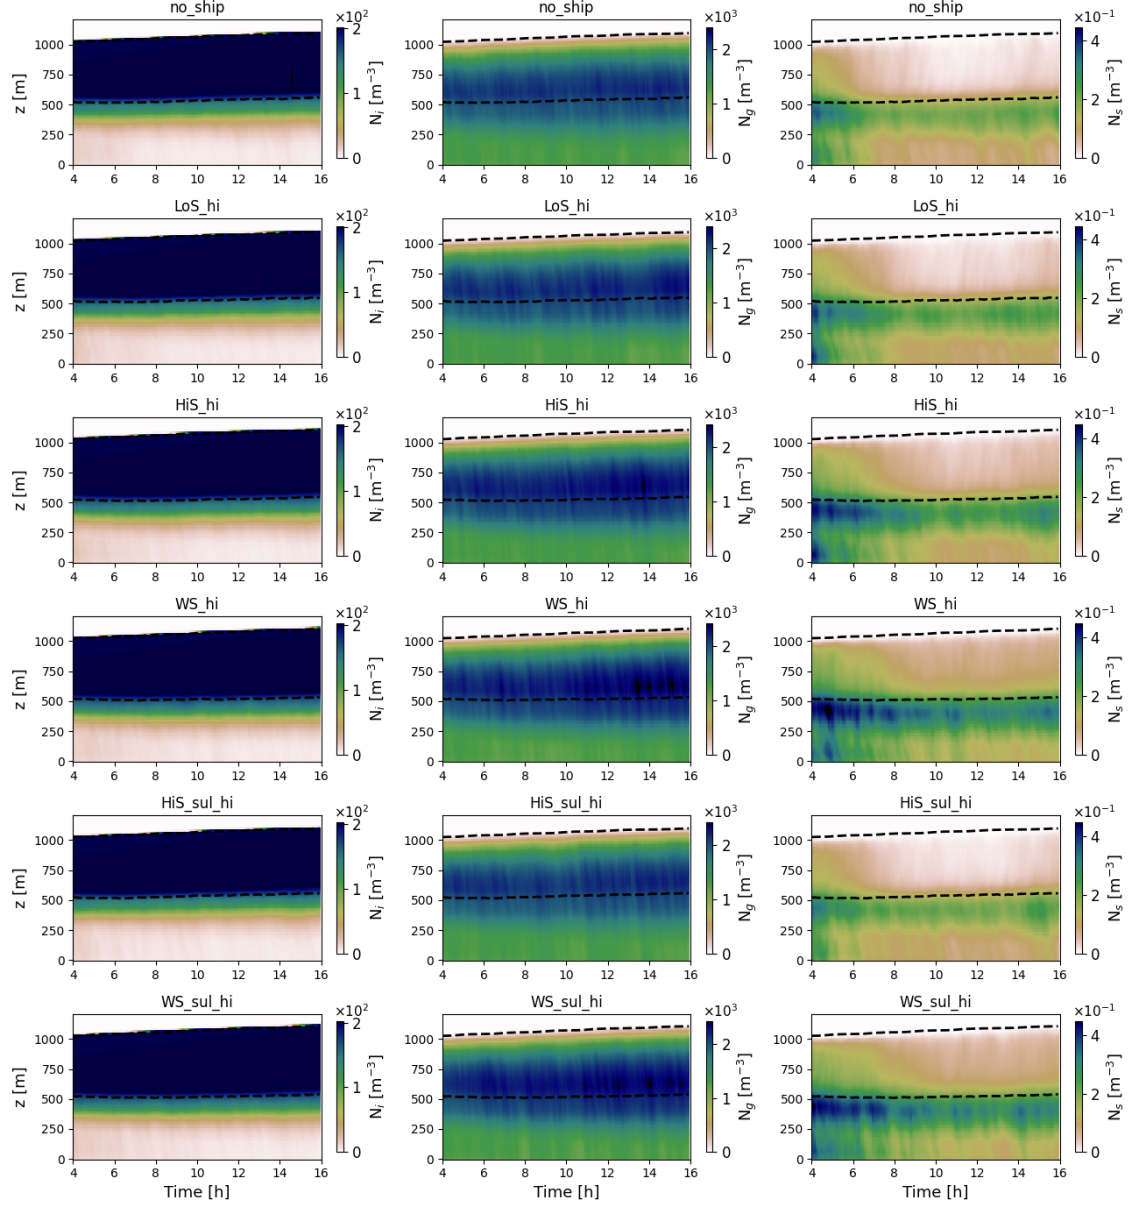

**Figure B1.** Temporal evolution of horizontally averaged number concentrations of ice crystals ( $N_i$ ), graupel ( $N_g$ ) and snow ( $N_s$ ) simulated for the reference case (Mixno\_ship) and the high ship aerosol concentration cases LoS\_hi, HiS\_hi, WS\_hi, HiS\_sul\_hi and WS\_sul\_hi. The black dashed lines represent case-specific, horizontally averaged cloud bottom and cloud top heights. The spin-up period (0 to 4 h) is removed from all figures.

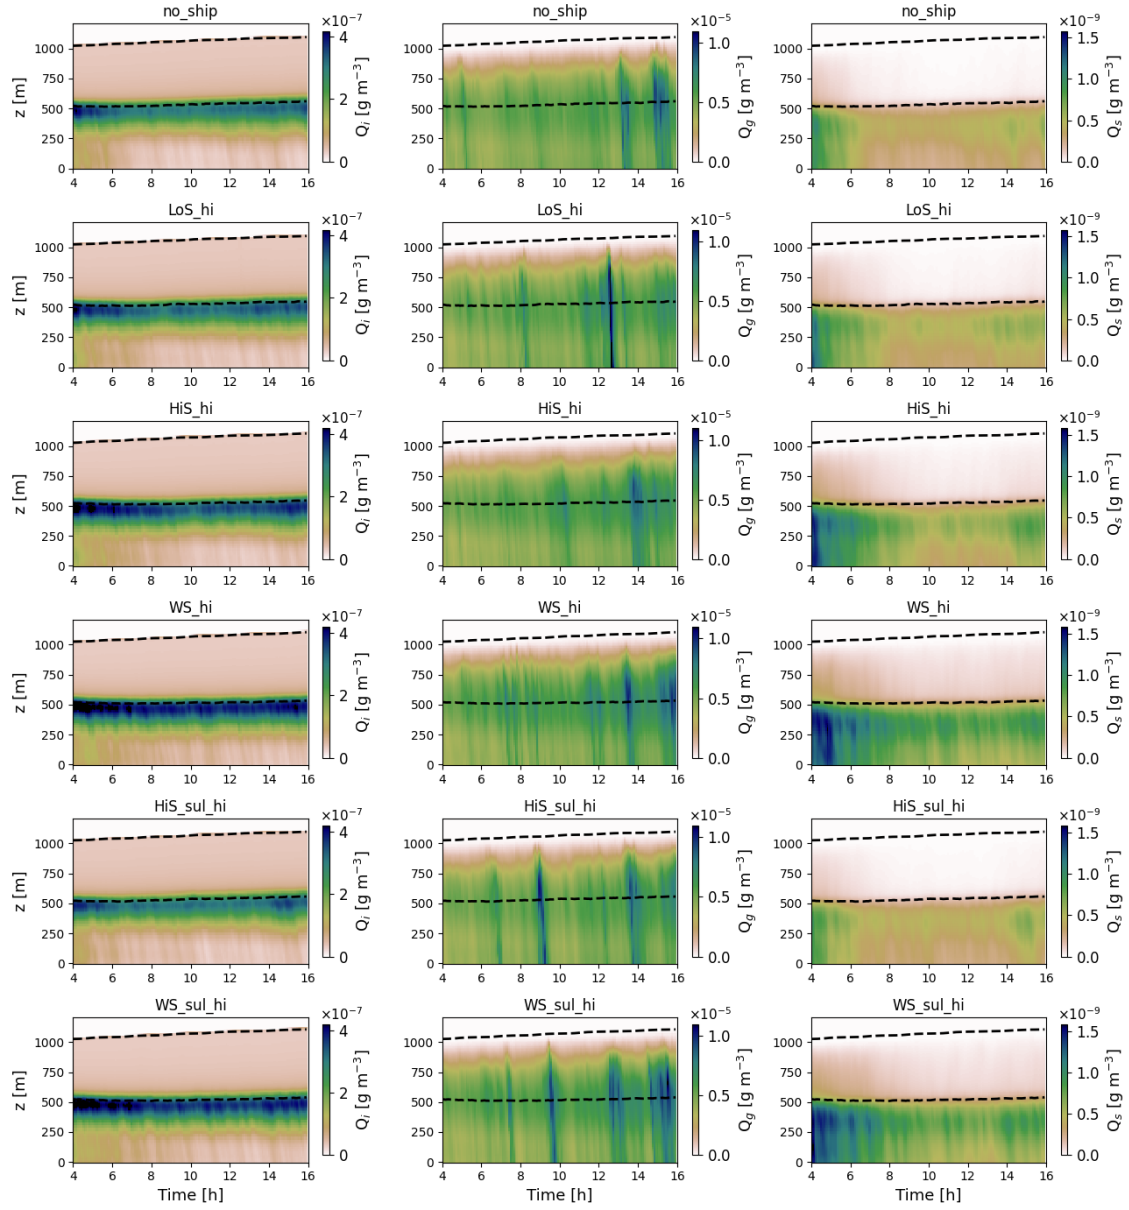

**Figure B2.** Temporal evolution of horizontally averaged mixing ratios of ice crystals ( $Q_i$ ), graupel ( $Q_g$ ) and snow ( $Q_s$ ) simulated for the reference case (no\_ship) and the high ship aerosol concentration cases LoS\_hi, HiS\_hi, WS\_hi, HiS\_sul\_hi and WS\_sul\_hi. The black dashed lines represent case-specific, horizontally averaged cloud bottom and cloud top heights. The spin-up period (0 to 4 h) is removed from all figures.

## Appendix C: Net shortwave surface fluxes

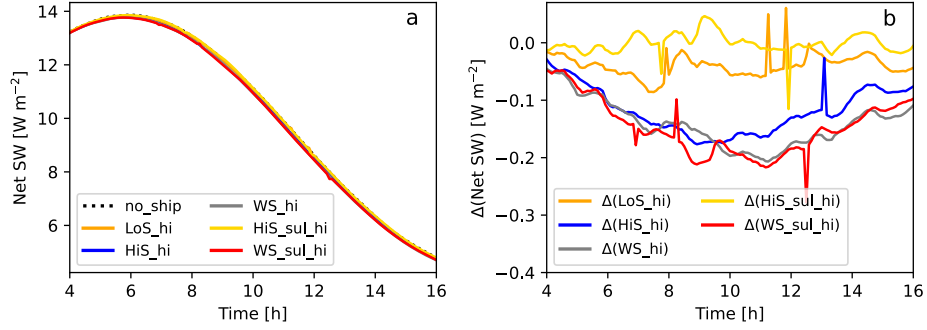

**Figure C1.** (a) Time evolution of the simulated domain-averaged net shortwave radiation at the surface (Net SW) for the set of ship exhaust sensitivity cases with  $N_i = 200 \text{ m}^{-3}$  and the corresponding no\_ship case. Only ship exhaust sensitivity cases with high concentrations (hi) are shown in the figure. (b) Corresponding absolute changes in net SW surface fluxes calculated as  $(\text{Net SW})_{\text{ship}} - (\text{Net SW})_{\text{no\_ship}}$ .

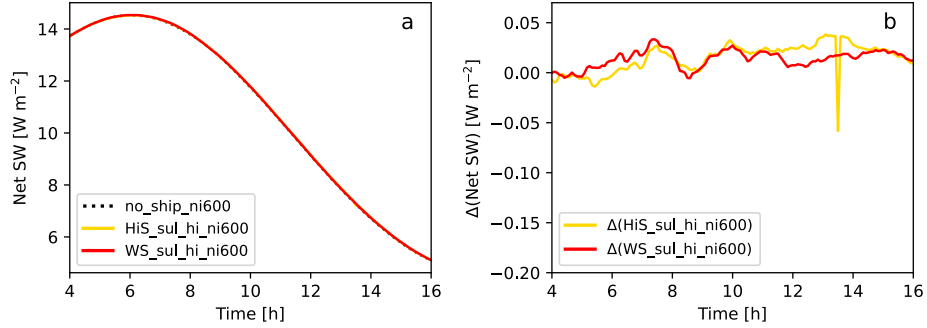

**Figure C2.** (a) Time evolution of the simulated domain-averaged net shortwave radiation at the surface (Net SW) for the set of ship exhaust sensitivity cases with  $N_i = 600 \text{ m}^{-3}$  and the corresponding no\_ship\_ni600 case. Only ship exhaust sensitivity cases with high concentrations (hi) are shown in the figure. (b) Corresponding absolute changes in net SW surface fluxes calculated as  $(\text{Net SW})_{\text{ship}} - (\text{Net SW})_{\text{no\_ship}}$ .

## Appendix D: Averaged profiles of ice-phase hydrometeors

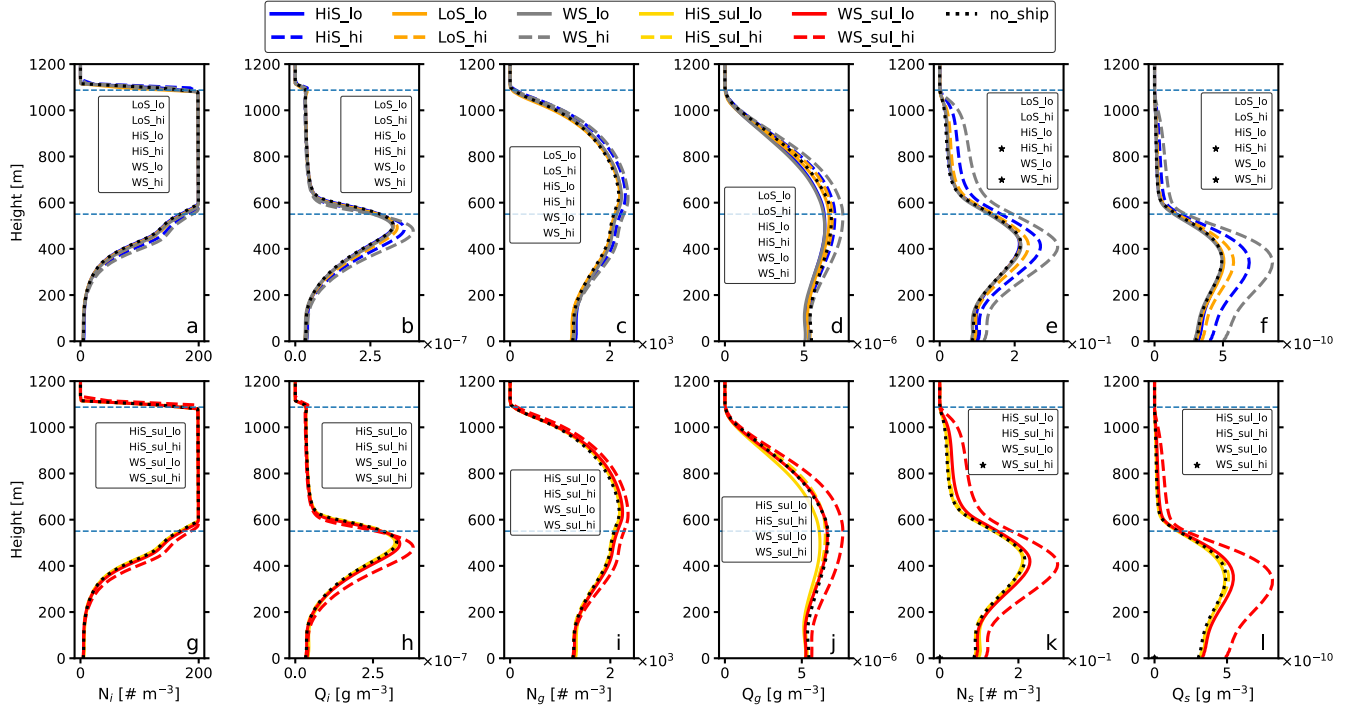

**Figure D1.** Vertical profiles of horizontally averaged (a and g)  $N_i$ , (b and h)  $Q_i$ , (c and i)  $N_g$ , (d and j)  $Q_g$ , (e and k)  $N_s$  and (f and l)  $Q_s$  averaged over the last four simulation hours. The light blue, dashed line represents the average cloud bottom and top height calculated for the reference case (**Mix**no\_ship). HiS, LoS, and WS represent ship aerosol from measurements of high and low sulfur content fuels and wet scrubbing respectively (Santos et al., 2022, 2023). The HiS\_sul and WS\_sul cases represent sulfate particle modes of high FSC fuel combustion and exhaust gas wet scrubbing from Santos et al. (2024). The label additions lo and hi signify the ship aerosol concentrations used in the individual model runs. Significant differences between ship exhaust cases and **Mix**no\_ship were assessed using two-sided  $t$  tests at a confidence level of 95 %. Model runs with significant differences are marked with star icons in inset legends.

*Author contributions.* Idea: EST and AE. Conceptualization: LI, HF, AE. Model implementation and simulations: LS, HF, LI, and ABP. Analysis of the data: LS, HF, LI, ABP. Visualization: LS. Writing, review and editing: All co-authors.

500 *Competing interests.* The authors declare that they have no conflict of interest.

*Acknowledgements.* This research was funded by the Swedish Research Councils FORMAS (2017-00564) and VR (2020-03497 & 2021-04042). EST, LS, HF, ABP, and LI thank the Swedish Strategic Research Area MERGE for their support. HF and LI were supported by Chalmers Gender Initiative for Excellence (Genie). The computations were enabled by resources provided by the National Academic Infrastructure for Supercomputing in Sweden (NAISS) at the National Supercomputer Centre (NSC) partially funded by the Swedish Research Council through grant agreement no. 2022-06725.

## References

- Albrecht, B. A.: Aerosols, Cloud Microphysics, and Fractional Cloudiness, *Science*, 245, 1227–1230, <https://doi.org/10.1126/science.245.4923.1227>, 1989.
- Andreasen, A. and Mayer, S.: Use of seawater scrubbing for SO<sub>2</sub> removal from marine engine exhaust gas, *Energy and Fuels*, 21, 3274–3279, <https://doi.org/10.1021/ef700359w>, 2007.
- Barton, N. and Veron, D.: Response of clouds and surface energy fluxes to changes in sea-ice cover over the Laptev Sea (Arctic Ocean), *Climate Research*, 54, 69–84, <https://doi.org/10.3354/cr01101>, 2012.
- Browse, J., Carslaw, K. S., Schmidt, A., and Corbett, J. J.: Impact of future Arctic shipping on high-latitude black carbon deposition, *Geophysical Research Letters*, 40, 4459–4463, <https://doi.org/10.1002/grl.50876>, 2013.
- 515 Bulatovic, I., Igel, A. L., Leck, C., Heintzenberg, J., Riipinen, I., and Ekman, A. M. L.: The importance of Aitken mode aerosol particles for cloud sustenance in the summertime high Arctic – a simulation study supported by observational data, *Atmos. Chem. Phys.*, 21, 3871–3897, <https://doi.org/10.5194/acp-21-3871-2021>, 2021.
- Bulatovic, I., Savre, J., Tjernström, M., Leck, C., and Ekman, A. M. L.: Large-eddy simulation of a two-layer boundary-layer cloud system from the Arctic Ocean 2018 expedition, *Atmospheric Chemistry and Physics*, 23, 7033–7055, <https://doi.org/10.5194/acp-23-7033-2023>,  
520 2023.
- Celik, S., Drewnick, F., Fachinger, F., Brooks, J., Darbyshire, E., Coe, H., Paris, J.-D., Eger, P. G., Schuladen, J., Tadic, I., Friedrich, N., Dienhart, D., Hottmann, B., Fischer, H., Crowley, J. N., Harder, H., and Borrmann, S.: Influence of vessel characteristics and atmospheric processes on the gas and particle phase of ship emission plumes: in situ measurements in the Mediterranean Sea and around the Arabian Peninsula, *Atmospheric Chemistry and Physics*, 20, 4713–4734, <https://doi.org/10.5194/acp-20-4713-2020>, 2020.
- 525 Christensen, M. W., Suzuki, K., Zambri, B., and Stephens, G. L.: Ship track observations of a reduced shortwave aerosol indirect effect in mixed-phase clouds, *Geophysical Research Letters*, 41, 6970–6977, <https://doi.org/10.1002/2014GL061320>, 2014.
- Christiansen, S., Ickes, L., Bulatovic, I., Leck, C., Murray, B. J., Bertram, A. K., Wagner, R., Gorokhova, E., Salter, M. E., Ekman, A. M., and Bilde, M.: Influence of Arctic Microlayers and Algal Cultures on Sea Spray Hygroscopicity and the Possible Implications for Mixed-Phase Clouds, *Journal of Geophysical Research: Atmospheres*, 125, <https://doi.org/10.1029/2020JD032808>, 2020.
- 530 Coakley, J. A., Bernstein, R. L., and Durkee, P. A.: Effect of Ship-Stack Effluents on Cloud Reflectivity, *Science*, 237, 1020–1022, <https://doi.org/10.1126/science.237.4818.1020>, 1987.
- Corbett, J. J., Winebrake, J. J., Green, E. H., Kasibhatla, P., Eyring, V., and Lauer, A.: Mortality from Ship Emissions: A Global Assessment, *Environmental Science & Technology*, 41, 8512–8518, <https://doi.org/10.1021/es071686z>, 2007.
- Corbett, J. J., Lack, D. A., Winebrake, J. J., Harder, S., Silberman, J. A., and Gold, M.: Arctic shipping emissions inventories and future  
535 scenarios, *Atmospheric Chemistry and Physics*, 10, 9689–9704, <https://doi.org/10.5194/acp-10-9689-2010>, 2010.
- Dall’Osto, M., Beddows, D. C. S., Tunved, P., Krejci, R., Ström, J., Hansson, H.-C., Yoon, Y. J., Park, K.-T., Becagli, S., Udisti, R., Onasch, T., O’Dowd, C. D., Simó, R., and Harrison, R. M.: Arctic sea ice melt leads to atmospheric new particle formation, *Scientific Reports*, 7, 3318, <https://doi.org/10.1038/s41598-017-03328-1>, 2017.
- Dalsøren, S. B., Samset, B. H., Myhre, G., Corbett, J. J., Minjares, R., Lack, D., and Fuglestad, J. S.: Environmental Impacts of Shipping in  
540 2030 with a Particular Focus on the Arctic Region, *Atmospheric Chem. Phys.*, 13, 1941–1955, <https://doi.org/10.5194/acp-13-1941-2013>, 2013.

- Durkee, P. A., Noone, K. J., Ferek, R. J., Johnson, D. W., Taylor, J. P., Garrett, T. J., Hobbs, P. V., Hudson, J. G., Bretherton, C. S., Innis, G., Frick, G. M., Hoppel, W. A., O'Dowd, C. D., Russell, L. M., Gasparovic, R., Nielsen, K. E., Tessmer, S. A., Öström, E., Osborne, S. R., Flagan, R. C., Seinfeld, J. H., and Rand, H.: The Impact of Ship-Produced Aerosols on the Microstructure and Albedo of Warm Marine Stratocumulus Clouds: A Test of MAST Hypotheses Ii and Iii, *Journal of the Atmospheric Sciences*, 57, 2554–2569, [https://doi.org/10.1175/1520-0469\(2000\)057<2554:TIOSPA>2.0.CO;2](https://doi.org/10.1175/1520-0469(2000)057<2554:TIOSPA>2.0.CO;2), 2000.
- Eirund, G. K., Possner, A., and Lohmann, U.: Response of Arctic mixed-phase clouds to aerosol perturbations under different surface forcings, *Atmospheric Chemistry and Physics*, 19, 9847–9864, <https://doi.org/10.5194/acp-19-9847-2019>, 2019.
- Eyring, V., Isaksen, I. S., Berntsen, T., Collins, W. J., Corbett, J. J., Endresen, O., Grainger, R. G., Moldanova, J., Schlager, H., and Stevenson, D. S.: Transport impacts on atmosphere and climate: Shipping, *Atmospheric Environment*, 44, 4735–4771, <https://doi.org/10.1016/j.atmosenv.2009.04.059>, 2010.
- Freud, E. and Rosenfeld, D.: Linear relation between convective cloud drop number concentration and depth for rain initiation, *Journal of Geophysical Research: Atmospheres*, 117, n/a–n/a, <https://doi.org/10.1029/2011JD016457>, 2012.
- Fridell, E. and Salo, K.: Measurements of abatement of particles and exhaust gases in a marine gas scrubber, *Proceedings of the Institution of Mechanical Engineers, Part M: Journal of Engineering for the Maritime Environment*, 230, 154–162, <https://doi.org/10.1177/1475090214543716>, 2016.
- Frostenberg, H. C., Welti, A., Luhr, M., Savre, J., Thomson, E. S., and Ickes, L.: The chance of freezing – a conceptional study to parameterize temperature-dependent freezing by including randomness of ice-nucleating particle concentrations, *Atmospheric Chemistry and Physics*, 23, 10 883–10 900, <https://doi.org/10.5194/acp-23-10883-2023>, 2023.
- Fu, Q. and Liou, K. N.: On the Correlated k-Distribution Method for Radiative Transfer in Nonhomogeneous Atmospheres, *Journal of Atmospheric Sciences*, 49, 2139 – 2156, [https://doi.org/10.1175/1520-0469\(1992\)049<2139:OTCDMF>2.0.CO;2](https://doi.org/10.1175/1520-0469(1992)049<2139:OTCDMF>2.0.CO;2), 1992.
- Gilgen, A., Huang, W. T. K., Ickes, L., Neubauer, D., and Lohmann, U.: How important are future marine and shipping aerosol emissions in a warming Arctic summer and autumn?, *Atmospheric Chemistry and Physics*, 18, 10 521–10 555, <https://doi.org/10.5194/acp-18-10521-2018>, 2018.
- Gryspeerd, E., Smith, T. W. P., O’Keeffe, E., Christensen, M. W., and Goldsworth, F. W.: The Impact of Ship Emission Controls Recorded by Cloud Properties, *Geophysical Research Letters*, 46, 12 547–12 555, <https://doi.org/10.1029/2019GL084700>, 2019.
- Hobbs, P. V., Garrett, T. J., Ferek, R. J., Strader, S. R., Hegg, D. A., Frick, G. M., Hoppel, W. A., Gasparovic, R. F., Russell, L. M., Johnson, D. W., O’Dowd, C., Durkee, P. A., Nielsen, K. E., and Innis, G.: Emissions from ships with respect to their effects on clouds, *Journal of the Atmospheric Sciences*, 57, 2570–2590, [https://doi.org/10.1175/1520-0469\(2000\)057<2570:EFSWRT>2.0.CO;2](https://doi.org/10.1175/1520-0469(2000)057<2570:EFSWRT>2.0.CO;2), 2000.
- Igel, A. L., Ekman, A. M. L., Leck, C., Tjernström, M., Savre, J., and Sedlar, J.: The free troposphere as a potential source of arctic boundary layer aerosol particles, *Geophysical Research Letters*, 44, 7053–7060, <https://doi.org/10.1002/2017GL073808>, 2017.
- IMO: RESOLUTION MEPC.176(58) - Revised MARPOL Annex VI, 2008.
- IMO: RESOLUTION MEPC.329(76) - Prohibition on the use and carriage for use as fuel of heavy fuel oil by ships in Arctic waters, 2021.
- IMO: MEPC 80/9/1 - Reducing Black Carbon emissions in the Arctic, 2023a.
- IMO: MEPC 80/16/2 - Development of a proposal to designate a Canadian Arctic Emission Control Area, 2023b.
- Intrieri, J. M., Fairall, C. W., Shupe, M. D., Persson, P. O. G., Andreas, E. L., Guest, P. S., and Moritz, R. E.: An annual cycle of Arctic surface cloud forcing at SHEBA, *Journal of Geophysical Research: Oceans*, 107, <https://doi.org/10.1029/2000JC000439>, 2002.
- Jeong, S., Bendl, J., Saraji-Bozorgzad, M., Käfer, U., Etzien, U., Schade, J., Bauer, M., Jakobi, G., Orasche, J., Fisch, K., Cwierz, P. P., Rüger, C. P., Czech, H., Karg, E., Heyen, G., Krausnick, M., Geissler, A., Geipel, C., Streibel, T., Schnelle-Kreis, J., Sklorz, M., Schulz-Bull,

- 580 D. E., Buchholz, B., Adam, T., and Zimmermann, R.: Aerosol emissions from a marine diesel engine running on different fuels and effects of exhaust gas cleaning measures, *Environmental Pollution*, 316, 120 526, <https://doi.org/10.1016/j.envpol.2022.120526>, 2023.
- Jonson, J. E., Gauss, M., Schulz, M., Jalkanen, J.-P., and Fagerli, H.: Effects of global ship emissions on European air pollution levels, *Atmospheric Chemistry and Physics*, 20, 11 399–11 422, <https://doi.org/10.5194/acp-20-11399-2020>, 2020.
- Kanji, Z. A., Welti, A., Corbin, J. C., and Mensah, A. A.: Black Carbon Particles Do Not Matter for Immersion Mode Ice Nucleation, *Geophysical Research Letters*, 47, 1–9, <https://doi.org/10.1029/2019GL086764>, 2020.
- 585 Kuittinen, N., Jalkanen, J.-P., Alanen, J., Ntziachristos, L., Hannuniemi, H., Johansson, L., Karjalainen, P., Saukko, E., Isotalo, M., Aakko-Saksa, P., Lehtoranta, K., Keskinen, J., Simonen, P., Saarikoski, S., Asmi, E., Laurila, T., Hillamo, R., Mylläri, F., Lihavainen, H., Timonen, H., and Rönkkö, T.: Shipping Remains a Globally Significant Source of Anthropogenic PN Emissions Even after 2020 Sulfur Regulation, *Environmental Science & Technology*, 55, 129–138, <https://doi.org/10.1021/acs.est.0c03627>, 2021.
- 590 Kupiszewski, P., Leck, C., Tjernström, M., Sjogren, S., Sedlar, J., Graus, M., Müller, M., Brooks, B., Swietlicki, E., Norris, S., and Hansel, A.: Vertical profiling of aerosol particles and trace gases over the central Arctic Ocean during summer, *Atmospheric Chemistry and Physics*, 13, 12 405–12 431, <https://doi.org/10.5194/acp-13-12405-2013>, 2013.
- Lack, D. A. and Corbett, J. J.: Black carbon from ships: A review of the effects of ship speed, fuel quality and exhaust gas scrubbing, *Atmospheric Chemistry and Physics*, 12, 3985–4000, <https://doi.org/10.5194/acp-12-3985-2012>, 2012.
- 595 Lack, D. A., Corbett, J. J., Onasch, T., Lerner, B., Massoli, P., Quinn, P. K., Bates, T. S., Covert, D. S., Coffman, D., Sierau, B., Herndon, S., Allan, J., Baynard, T., Lovejoy, E., Ravishankara, A. R., and Williams, E.: Particulate emissions from commercial shipping: Chemical, physical, and optical properties, *J. Geophys. Res.: Atmos.*, 114, 1–16, <https://doi.org/10.1029/2008JD011300>, 2009.
- Lack, D. A., Cappa, C. D., Langridge, J., Bahreini, R., Buffaloe, G., Brock, C., Cerully, K., Coffman, D., Hayden, K., Holloway, J., Lerner, B., Massoli, P., Li, S.-M., McLaren, R., Middlebrook, A. M., Moore, R., Nenes, A., Nuaaman, I., Onasch, T. B., Peischl, J., Perring, A., Quinn, P. K., Ryerson, T., Schwartz, J. P., Spackman, R., Wofsy, S. C., Worsnop, D., Xiang, B., and Williams, E.: Impact of Fuel Quality Regulation and Speed Reductions on Shipping Emissions: Implications for Climate and Air Quality, *Environmental Science & Technology*, 45, 9052–9060, <https://doi.org/10.1021/es2013424>, 2011.
- 600 Lasserre, F. and Pelletier, S.: Polar super seaways? Maritime transport in the Arctic: an analysis of shipowners’ intentions, *Journal of Transport Geography*, 19, 1465–1473, <https://doi.org/10.1016/j.jtrangeo.2011.08.006>, 2011.
- 605 Lauer, A., Eyring, V., Hendricks, J., Jöckel, P., and Lohmann, U.: Global model simulations of the impact of ocean-going ships on aerosols, clouds, and the radiation budget, *Atmospheric Chemistry and Physics*, 7, 5061–5079, <https://doi.org/10.5194/acp-7-5061-2007>, 2007.
- Lehtoranta, K., Aakko-Saksa, P., Murtonen, T., Vesala, H., Ntziachristos, L., Rönkkö, T., Karjalainen, P., Kuittinen, N., and Timonen, H.: Particulate Mass and Nonvolatile Particle Number Emissions from Marine Engines Using Low-Sulfur Fuels, Natural Gas, or Scrubbers, *Environmental Science & Technology*, 53, 3315–3322, <https://doi.org/10.1021/acs.est.8b05555>, 2019.
- 610 Li, X., Lynch, A. H., Bailey, D. A., Stephenson, S. R., and Veland, S.: The impact of black carbon emissions from projected Arctic shipping on regional ice transport, *Climate Dynamics*, 57, 2453–2466, <https://doi.org/10.1007/s00382-021-05814-9>, 2021.
- Lieke, K. I., Rosenørn, T., Pedersen, J., Larsson, D., Kling, J., Fuglsang, K., and Bilde, M.: Micro- and Nanostructural Characteristics of Particles Before and After an Exhaust Gas Recirculation System Scrubber, *Aerosol Science and Technology*, 47, 1038–1046, <https://doi.org/10.1080/02786826.2013.813012>, 2013.
- 615 Liu, H., Fu, M., Jin, X., Shang, Y., Shindell, D., Faluvegi, G., Shindell, C., and He, K.: Health and climate impacts of ocean-going vessels in East Asia, *Nature Climate Change*, 6, 1037–1041, <https://doi.org/10.1038/nclimate3083>, 2016.

- Lund, M. T., Eyring, V., Fuglestad, J., Hendricks, J., Lauer, A., Lee, D., and Righi, M.: Global-Mean Temperature Change from Shipping toward 2050: Improved Representation of the Indirect Aerosol Effect in Simple Climate Models, *Environmental Science & Technology*, 46, 8868–8877, <https://doi.org/10.1021/es301166e>, 2012.
- 620 Lund, M. T., Aamaas, B., Stjern, C. W., Klimont, Z., Berntsen, T. K., and Samset, B. H.: A continued role of short-lived climate forcers under the Shared Socioeconomic Pathways, *Earth System Dynamics*, 11, 977–993, <https://doi.org/10.5194/esd-11-977-2020>, 2020.
- Mahrt, F., Marcolli, C., David, R. O., Grönquist, P., Barthazy Meier, E. J., Lohmann, U., and Kanji, Z. A.: Ice nucleation abilities of soot particles determined with the Horizontal Ice Nucleation Chamber, *Atmospheric Chemistry and Physics*, 18, 13 363–13 392, <https://doi.org/10.5194/acp-18-13363-2018>, 2018.
- 625 Manshausen, P., Watson-Parris, D., Christensen, M. W., Jalkanen, J.-P., and Stier, P.: Invisible Ship Tracks Show Large Cloud Sensitivity to Aerosol, *Nature*, 610, 101–106, <https://doi.org/10.1038/s41586-022-05122-0>, 2022.
- Mauritsen, T., Sedlar, J., Tjernström, M., Leck, C., Martin, M., Shupe, M., Sjogren, S., Sierau, B., Persson, P. O., Brooks, I. M., and Swietlicki, E.: An Arctic CCN-limited cloud-aerosol regime, *Atmos. Chem. Phys.*, 11, 165–173, <https://doi.org/10.5194/acp-11-165-2011>, 2011.
- Meador, W. E. and Weaver, W. R.: Two-Stream Approximations to Radiative Transfer in Planetary Atmospheres: A Unified Description of Existing Methods and a New Improvement, *Journal of Atmospheric Sciences*, 37, 630 – 643, [https://doi.org/10.1175/1520-0469\(1980\)037<0630:TSATRT>2.0.CO;2](https://doi.org/10.1175/1520-0469(1980)037<0630:TSATRT>2.0.CO;2), 1980.
- 630 Morrison, H., De Boer, G., Feingold, G., Harrington, J., Shupe, M. D., and Sulia, K.: Resilience of persistent Arctic mixed-phase clouds, *Nature Geoscience*, 5, 11–17, <https://doi.org/10.1038/ngeo1332>, 2012.
- Oikawa, K., Yongsiri, C., Takeda, K., and Harimoto, T.: Seawater flue gas desulfurization: Its technical implications and performance results, *Environmental Progress*, 22, 67–73, <https://doi.org/10.1002/ep.670220118>, 2003.
- 635 Ovchinnikov, M., Korolev, A., and Fan, J.: Effects of ice number concentration on dynamics of a shallow mixed-phase stratiform cloud, *Journal of Geophysical Research*, 116, D00T06, <https://doi.org/10.1029/2011JD015888>, 2011.
- Ovchinnikov, M., Ackerman, A. S., Avramov, A., Cheng, A., Fan, J., Fridlind, A. M., Ghan, S., Harrington, J., Hoose, C., Korolev, A., McFarquhar, G. M., Morrison, H., Paukert, M., Savre, J., Shipway, B. J., Shupe, M. D., Solomon, A., and Sulia, K.: Intercomparison of large-eddy simulations of Arctic mixed-phase clouds: Importance of ice size distribution assumptions, *Journal of Advances in Modeling Earth Systems*, 6, 223–248, <https://doi.org/10.1002/2013MS000282>, 2014.
- 640 Paxian, A., Eyring, V., Beer, W., Sausen, R., and Wright, C.: Present-day and future global bottom-up ship emission inventories including polar routes, *Environmental Science and Technology*, 44, 1333–1339, <https://doi.org/10.1021/es9022859>, 2010.
- Peters, G. P., Nilssen, T. B., Lindholt, L., Eide, M. S., Glomsrød, S., Eide, L. I., and Fuglestad, J. S.: Future emissions from shipping and petroleum activities in the Arctic, *Atmospheric Chemistry and Physics*, 11, 5305–5320, <https://doi.org/10.5194/acp-11-5305-2011>, 2011.
- 645 Petters, M. D. and Kreidenweis, S. M.: A single parameter representation of hygroscopic growth and cloud condensation nucleus activity, *Atmospheric Chemistry and Physics*, 7, 1961–1971, <https://doi.org/10.5194/acp-7-1961-2007>, 2007.
- Petzold, A., Hasselbach, J., Lauer, P., Baumann, R., Franke, K., Gurk, C., Schlager, H., and Weingartner, E.: Experimental studies on particle emissions from cruising ship, their characteristic properties, transformation and atmospheric lifetime in the marine boundary layer, *Atmospheric Chemistry and Physics*, 8, 2387–2403, <https://doi.org/10.5194/acp-8-2387-2008>, 2008.
- 650 Possner, A., Ekman, A. M. L., and Lohmann, U.: Cloud response and feedback processes in stratiform mixed-phase clouds perturbed by ship exhaust, *Geophysical Research Letters*, 44, 1964–1972, <https://doi.org/10.1002/2016GL071358>, 2017.

- Possner, A., Wang, H., Wood, R., Caldeira, K., and Ackerman, T. P.: The efficacy of aerosol–cloud radiative perturbations from near-surface emissions in deep open-cell stratocumuli, *Atmospheric Chemistry and Physics*, 18, 17 475–17 488, [https://doi.org/10.5194/acp-18-17475-](https://doi.org/10.5194/acp-18-17475-2018)  
655 2018, 2018.
- Rantanen, M., Karpechko, A. Y., Lipponen, A., Nordling, K., Hyvärinen, O., Ruosteenoja, K., Vihma, T., and Laaksonen, A.: The Arctic has warmed nearly four times faster than the globe since 1979, *Communications Earth & Environment*, 3, 168, [https://doi.org/10.1038/s43247-](https://doi.org/10.1038/s43247-022-00498-3)  
022-00498-3, 2022.
- Roberts, G. C. and Nenes, A.: A Continuous-Flow Streamwise Thermal-Gradient CCN Chamber for Atmospheric Measurements, *Aerosol*  
660 *Science and Technology*, 39, 206–221, <https://doi.org/10.1080/027868290913988>, 2005.
- Santos, L. F. E. d., Salo, K., and Thomson, E. S.: Quantification and physical analysis of nanoparticle emissions from a marine engine using different fuels and a laboratory wet scrubber, *Environ. Sci.: Processes Impacts*, 24, 1769–1781, <https://doi.org/10.1039/D2EM00054G>,  
2022.
- Santos, L. F. E. d., Salo, K., Kong, X., Noda, J., Kristensen, T. B., Ohigashi, T., and Thomson, E. S.: Changes in CCN activity of  
665 ship exhaust particles induced by fuel sulfur content reduction and wet scrubbing, *Environmental Science: Atmospheres*, 3, 182–195, <https://doi.org/10.1039/D2EA00081D>, 2023.
- Santos, L. F. E. D., Salo, K., Kong, X., Hartmann, M., Sjöblom, J., and Thomson, E. S.: Marine Fuel Regulations and Engine Emissions: Impacts on Physicochemical Properties, Cloud Activity and Emission Factors, *Journal of Geophysical Research: Atmospheres*, 129, e2023JD040 389, <https://doi.org/https://doi.org/10.1029/2023JD040389>, 2024.
- 670 Savre, J., Ekman, A. M. L., and Svensson, G.: Technical note: Introduction to MIMICA, a large-eddy simulation solver for cloudy planetary boundary layers, *Journal of Advances in Modeling Earth Systems*, 6, 630–649, <https://doi.org/10.1002/2013MS000292>, 2014.
- Savre, J., Ekman, A. M. L., Svensson, G., and Tjernström, M.: Large-eddy simulations of an Arctic mixed-phase stratiform cloud observed during ISDAC: sensitivity to moisture aloft, surface fluxes and large-scale forcing, *Quarterly Journal of the Royal Meteorological Society*, 141, 1177–1190, <https://doi.org/10.1002/qj.2425>, 2015.
- 675 Schmale, J., Zieger, P., and Ekman, A. M. L.: Aerosols in current and future Arctic climate, *Nature Climate Change*, 11, 95–105, <https://doi.org/10.1038/s41558-020-00969-5>, 2021.
- Screen, J. A. and Simmonds, I.: The central role of diminishing sea ice in recent Arctic temperature amplification, *Nature*, 464, 1334–1337, <https://doi.org/10.1038/nature09051>, 2010.
- Seifert, A. and Beheng, K. D.: A double-moment parameterization for simulating autoconversion, accretion and selfcollection, *Atmospheric*  
680 *Research*, 59-60, 265–281, [https://doi.org/10.1016/S0169-8095\(01\)00126-0](https://doi.org/10.1016/S0169-8095(01)00126-0), 2001.
- Seifert, A. and Beheng, K. D.: A Two-Moment Cloud Microphysics Parameterization for Mixed-Phase Clouds. Part 1: Model Description, *Meteorol. Atmospheric Phys.*, 92, 45–66, <https://doi.org/10.1007/s00703-005-0112-4>, 2006.
- Seppälä, S. D., Kuula, J., Hyvärinen, A.-P., Saarikoski, S., Rönkkö, T., Keskinen, J., Jalkanen, J.-P., and Timonen, H.: Effects of marine fuel sulfur restrictions on particle number concentrations and size distributions in ship plumes in the Baltic Sea, *Atmospheric Chemistry and*  
685 *Physics*, 21, 3215–3234, <https://doi.org/10.5194/acp-21-3215-2021>, 2021.
- Serreze, M. C. and Barry, R. G.: Processes and impacts of Arctic amplification: A research synthesis, *Global and Planetary Change*, 77, 85–96, <https://doi.org/10.1016/j.gloplacha.2011.03.004>, 2011.
- Serreze, M. C. and Francis, J. A.: The Arctic Amplification Debate, *Climatic Change*, 76, 241–264, [https://doi.org/10.1007/s10584-005-](https://doi.org/10.1007/s10584-005-9017-y)  
9017-y, 2006.

- 690 Shupe, M. D. and Intrieri, J. M.: Cloud Radiative Forcing of the Arctic Surface: The Influence of Cloud Properties, Surface Albedo, and Solar Zenith Angle, *Journal of Climate*, 17, 616–628, [https://doi.org/10.1175/1520-0442\(2004\)017<0616:CRFOTA>2.0.CO;2](https://doi.org/10.1175/1520-0442(2004)017<0616:CRFOTA>2.0.CO;2), 2004.
- Smith, L. C. and Stephenson, S. R.: New Trans-Arctic shipping routes navigable by midcentury, *Proceedings of the National Academy of Sciences*, 110, <https://doi.org/10.1073/pnas.1214212110>, 2013.
- Sotiropoulou, G., Ickes, L., Nenes, A., and Ekman, A. M. L.: Ice Multiplication from Ice–Ice Collisions in the High Arctic: Sensitivity  
695 to Ice Habit, Rimed Fraction, Ice Type and Uncertainties in the Numerical Description of the Process, *Atmospheric Chem. Phys.*, 21, 9741–9760, <https://doi.org/10.5194/acp-21-9741-2021>, 2021.
- Stephens, G. L.: Radiation Profiles in Extended Water Clouds. II: Parameterization Schemes, *Journal of Atmospheric Sciences*, 35, 2123 – 2132, 1978.
- Stephenson, S. R., Wang, W., Zender, C. S., Wang, H., Davis, S. J., and Rasch, P. J.: Climatic Responses to Future Trans-Arctic Shipping,  
700 *Geophysical Research Letters*, 45, 9898–9908, <https://doi.org/10.1029/2018GL078969>, 2018.
- Stevens, R. G., Loewe, K., Dearden, C., Dimitrellos, A., Possner, A., Eirund, G. K., Raatikainen, T., Hill, A. A., Shipway, B. J., Wilkinson, J., Romakkaniemi, S., Tonttila, J., Laaksonen, A., Korhonen, H., Connolly, P., Lohmann, U., Hoose, C., Ekman, A. M. L., Carslaw, K. S., and Field, P. R.: A model intercomparison of CCN-limited tenuous clouds in the high Arctic, *Atmospheric Chemistry and Physics*, 18, 11 041–11 071, <https://doi.org/10.5194/acp-18-11041-2018>, 2018.
- 705 Tavakoli, F. and Olfert, J. S.: Determination of particle mass, effective density, mass-mobility exponent, and dynamic shape factor using an aerodynamic aerosol classifier and a differential mobility analyzer in tandem, *Journal of Aerosol Science*, 75, 35–42, <https://doi.org/10.1016/j.jaerosci.2014.04.010>, 2014.
- Taylor, P. C. and Monroe, E.: Isolating the Surface Type Influence on Arctic Low-Clouds, *Journal of Geophysical Research: Atmospheres*, 128, e2022JD038 098, <https://doi.org/10.1029/2022JD038098>, 2023.
- 710 Tjernström, M., Birch, C. E., Brooks, I. M., Shupe, M. D., Persson, P. O. G., Sedlar, J., Mauritsen, T., Leck, C., Paatero, J., Szczodrak, M., and Wheeler, C. R.: Meteorological Conditions in the Central Arctic Summer during the Arctic Summer Cloud Ocean Study (ASCOS), *Atmospheric Chem. Phys.*, 12, 6863–6889, <https://doi.org/10.5194/acp-12-6863-2012>, 2012.
- Tjernström, M., Leck, C., Birch, C. E., Bottenheim, J. W., Brooks, B. J., Brooks, I. M., Bäcklin, L., Chang, R. Y.-W., de Leeuw, G., Di Liberto, L., de la Rosa, S., Granath, E., Graus, M., Hansel, A., Heintzenberg, J., Held, A., Hind, A., Johnston, P., Knulst, J., Martin, M., Matrai,  
715 P. A., Mauritsen, T., Müller, M., Norris, S. J., Orellana, M. V., Orsini, D. A., Paatero, J., Persson, P. O. G., Gao, Q., Rauschenberg, C., Ristovski, Z., Sedlar, J., Shupe, M. D., Sierau, B., Sirevaag, A., Sjogren, S., Stetzer, O., Swietlicki, E., Szczodrak, M., Vaattovaara, P., Wahlberg, N., Westberg, M., and Wheeler, C. R.: The Arctic Summer Cloud Ocean Study (ASCOS): Overview and Experimental Design, *Atmospheric Chem. Phys.*, 14, 2823–2869, <https://doi.org/10.5194/acp-14-2823-2014>, 2014.
- UNCTAD: Review of Maritime Transport 2023, no. 2022 in Review of maritime transport / United Nations Conference on Trade and  
720 Development, Geneva, United Nations, Geneva, 2022.
- Wang, C. and Chang, J. S.: A three-dimensional numerical model of cloud dynamics, microphysics, and chemistry: 1. Concepts and formulation, *Journal of Geophysical Research: Atmospheres*, 98, 14 827–14 844, <https://doi.org/10.1029/92JD01393>, 1993.
- Watson-Parris, D., Christensen, M. W., Laurenson, A., Clewley, D., Gryspeerdt, E., and Stier, P.: Shipping Regulations Lead to Large Reduction in Cloud Perturbations, *Proc. Natl. Acad. Sci.*, 119, e2206885 119, <https://doi.org/10.1073/pnas.2206885119>, 2022.
- 725 Winnes, H., Fridell, E., and Moldanová, J.: Effects of Marine Exhaust Gas Scrubbers on Gas and Particle Emissions, *Journal of Marine Science and Engineering*, 8, 299, <https://doi.org/10.3390/jmse8040299>, 2020.

- Yang, J., Tang, T., Jiang, Y., Karavalakis, G., Durbin, T. D., Wayne Miller, J., Cocker, D. R., and Johnson, K. C.: Controlling emissions from an ocean-going container vessel with a wet scrubber system, *Fuel*, 304, 121 323, <https://doi.org/10.1016/j.fuel.2021.121323>, 2021.
- 730 Yu, C., Pasternak, D., Lee, J., Yang, M., Bell, T., Bower, K., Wu, H., Liu, D., Reed, C., Bauguitte, S., Cliff, S., Trembath, J., Coe, H., and Allan, J. D.: Characterizing the Particle Composition and Cloud Condensation Nuclei from Shipping Emission in Western Europe, *Environmental Science & Technology*, 54, 15 604–15 612, <https://doi.org/10.1021/acs.est.0c04039>, 2020.
- Yu, C., Pasternak, D., Lee, J., Yang, M., Bell, T., Bower, K., Wu, H., Liu, D., Reed, C., Bauguitte, S., Cliff, S., Trembath, J., Coe, H., and Allan, J. D.: Correction to “Characterizing the Particle Composition and Cloud Condensation Nuclei from Shipping Emission in Western Europe”, *Environmental Science & Technology*, 57, 7888–7889, <https://doi.org/10.1021/acs.est.3c03005>, 2023.
- 735 Yuan, T., Song, H., Wood, R., Wang, C., Oreopoulos, L., Platnick, S. E., von Hippel, S., Meyer, K., Light, S., and Wilcox, E.: Global Reduction in Ship-Tracks from Sulfur Regulations for Shipping Fuel, *Sci. Adv.*, 8, eabn7988, <https://doi.org/10.1126/sciadv.abn7988>, 2022.
- 740 Zetterdahl, M., Moldanová, J., Pei, X., Pathak, R. K., and Demirdjian, B.: Impact of the 0.1% fuel sulfur content limit in SECA on particle and gaseous emissions from marine vessels, *Atmospheric Environment*, 145, 338–345, <https://doi.org/10.1016/j.atmosenv.2016.09.022>, 2016.
